# Supplementary material for: Genome-wide association studies reveal potential candidate genes associated with amino acid in tea plants
Source: PeerJ. 2025 Mar 4;13:e18969. doi: 10.7717/peerj.18969 (PMC11887564; doi:10.7717/peerj.18969)
Supplement: Table S1 [file peerj-13-18969-s004.xlsx]

## Sheet: Sheet1
Table S1. Information of 212 tea accessions used in the present study.
Sample Name	DNA ID	Cultivation status	Growth habits	Species	STRUCTURE based grouping ( Qi ≥0.8) at K=3 with 212 accessions	Origin region	Details	Inferred populations
GZ001	1	Ancient landraces	cultivation type	Camellia sinensis?	pure2	Huaxi.Guizhou Province	Ancient cultivar shrub , more than two hundred years	Q2
GZ002	3	Ancient landraces	cultivation type	Camellia sinensis	pure1	Huaxi.Guizhou Province	Ancient cultivar shrub , more than two hundred years	Q1
GZ003	8	Ancient landraces	cultivation type	Camellia sinensis	pure1	Huaxi.Guizhou Province	Ancient cultivar shrub , more than two hundred years	Q1
GZ004	15	Ancient landraces	cultivation type	Camellia sinensis	pure1	Huaxi.Guizhou Province	Ancient cultivar shrub , more than two hundred years	Q1
GZ005	18	Ancient landraces	cultivation type	Camellia sinensis	pure1	Huaxi.Guizhou Province	Ancient cultivar shrub , more than two hundred years	Q1
GZ006	21	Ancient landraces	cultivation type	Camellia sinensis	Mosaic	Huaxi.Guizhou Province	Ancient cultivar shrub , more than two hundred years	Q4
GZ007	22	Ancient landraces	cultivation type	Camellia sinensis	pure1	Jinsha County.Guizhou Province	Ancient cultivar shrub , more than two hundred years	Q1
GZ008	24	Wild tree	wild type	camellia remotiserrata?	Mosaic	Jinsha County.Guizhou Province	Ancient wild tree. more than three hundred years	Q4
GZ009	25	Wild tree	wild type	camellia remotiserrata?	Mosaic	Jinsha County.Guizhou Province	Ancient wild tree. more than two hundred years	Q4
GZ010	26	Wild tree	wild type	camellia remotiserrata?	Mosaic	Jinsha County.Guizhou Province	Ancient wild tree. more than two hundred years	Q4
GZ011	27	Wild tree	wild type	camellia remotiserrata?	Mosaic	Jinsha County.Guizhou Province	Natural offsprings of Ancient wild tree	Q4
GZ012	28	Wild tree	wild type	camellia remotiserrata?	pure1	Jinsha County.Guizhou Province	Natural offsprings of Ancient wild tree	Q1
GZ013	33	Modern landraces	cultivation type	Camellia sinensis	pure2	Duyun City.Guizhou Province	landraces	Q2
GZ014	34	Modern landraces	cultivation type	Camellia sinensis	pure2	Duyun City.Guizhou Province	landraces	Q2
GZ015	38	Wild tree	wild type	Camellia tachangensis	pure3	Xingyi City.Guizhou Province	Ancient wild tree. more than one hundred years	Q3
GZ016	40	Ancient landraces	cultivation type	Camellia sinensis	Mosaic	zheng'an County.Guizhou Province	Ancient cultivar shrub , more than two hundred years	Q4
GZ017	44	Ancient landraces	cultivation type	Camellia sinensis	pure1	zheng'an County.Guizhou Province	Ancient cultivar shrub , more than two hundred years	Q1
GZ018	48	Wild tree	wild type	camellia remotiserrata?	Mosaic	zheng'an County.Guizhou Province	Ancient wild tree. more than one hundred years	Q4
GZ019	51	Ancient landraces	cultivation type	Camellia sinensis	pure1	zheng'an County.Guizhou Province	Ancient cultivar shrub , more than two hundred years	Q1
GZ020	60	Ancient landraces	cultivation type	Camellia sinensis	pure1	zheng'an County.Guizhou Province	Ancient cultivar shrub , more than two hundred years	Q1
GZ021	62	Ancient landraces	cultivation type	Camellia sinensis	Mosaic	zheng'an County.Guizhou Province	Ancient cultivar shrub , more than two hundred years	Q4
GZ022	63	Ancient landraces	cultivation type	Camellia sinensis	pure1	zheng'an County.Guizhou Province	Ancient cultivar shrub , more than two hundred years	Q1
GZ023	67	Wild tree	wild type	Camellia tachangensis?	Mosaic	Xingren County.Guizhou Province	Natural offsprings of Ancient wild tree	Q4
GZ024	70	Modern landraces	cultivation type	Camellia sinensis	Mosaic	Sandu County.Guizhou Province	landraces	Q4
GZ025	71	Modern landraces	cultivation type	Camellia sinensis	Mosaic	Sandu County.Guizhou Province	landraces	Q4
GZ026	73	Modern landraces	cultivation type	Camellia sinensis	Mosaic	Sandu County.Guizhou Province	landraces	Q4
GZ027	76	Modern landraces	cultivation type	Camellia sinensis	pure1	Sandu County.Guizhou Province	landraces	Q1
GZ028	79	Ancient landraces	cultivation type	Camellia sinensis	Mosaic	Duyun City.Guizhou Province	Ancient cultivar shrub, more than one hundred years	Q4
GZ029	80	Ancient landraces	cultivation type	Camellia sinensis	Mosaic	Duyun City.Guizhou Province	Ancient cultivar shrub, more than one hundred years	Q4
GZ030	83	Modern landraces	cultivation type	Camellia sinensis	pure2	Wuchuan County.Guizhou Province	landraces	Q2
GZ031	84	Modern landraces	cultivation type	Camellia sinensis	Mosaic	Wuchuan County.Guizhou Province	landraces	Q4
GZ032	85	Ancient landraces	cultivation type	Camellia sinensis	pure1	Daozhen County.Guizhou Province	Ancient cultivar shrub , more than two hundred years	Q1
GZ033	89	Wild tree	wild type	camellia remotiserrata?	Mosaic	Daozhen County.Guizhou Province	Ancient wild tree. more than one hundred years	Q4
GZ034	92	Ancient landraces	cultivation type	Camellia sinensis	pure1	Daozhen County.Guizhou Province	Ancient cultivar shrub , more than two hundred years	Q1
GZ035	93	Wild tree	wild type	camellia remotiserrata?	Mosaic	Daozhen County.Guizhou Province	Ancient wild tree. more than one hundred years	Q4
GZ036	97	Wild tree	wild type	Camellia tachangensis	pure2	Puan County.Guizhou Province	Natural offsprings of ancient wild tree	Q2
GZ037	100	Wild tree	wild type	Camellia tachangensis	pure2	Puan County.Guizhou Province	Natural offsprings of ancient wild tree	Q2
GZ038	103	Wild tree	wild type	Camellia tachangensis	pure3	Puan County.Guizhou Province	Natural offsprings of ancient wild tree	Q3
GZ039	107	Wild tree	wild type	camellia remotiserrata?	pure2	Wuchuan County.Guizhou Province	Ancient wild tree. more than one hundred years	Q2
GZ040	108	Wild tree	wild type	camellia remotiserrata?	Mosaic	Wuchuan County.Guizhou Province	Natural offsprings of ancient wild tree	Q4
GZ041	110	Wild tree	wild type	camellia remotiserrata?	Mosaic	Wuchuan County.Guizhou Province	Natural offsprings of ancient wild tree	Q4
GZ042	114	Wild tree	wild type	camellia remotiserrata?	Mosaic	Wuchuan County.Guizhou Province	Ancient wild tree. more than one hundred years	Q4
GZ043	117	Wild tree	wild type	camellia remotiserrata?	Mosaic	Wuchuan County.Guizhou Province	Natural offsprings of ancient wild tree	Q4
GZ044	118	Wild tree	wild type	camellia remotiserrata?	Mosaic	Wuchuan County.Guizhou Province	Ancient wild tree. more than one hundred years	Q4
GZ045	119	Wild tree	wild type	camellia remotiserrata?	Mosaic	Wuchuan County.Guizhou Province	Ancient wild tree. more than one hundred years	Q4
GZ046	120	Wild tree	wild type	camellia remotiserrata?	Mosaic	Wuchuan County.Guizhou Province	Ancient wild tree. more than one hundred years	Q4
GZ047	122	Wild tree	wild type	camellia remotiserrata?	Mosaic	Wuchuan County.Guizhou Province	Ancient wild tree. more than one hundred years	Q4
GZ048	123	Wild tree	wild type	camellia remotiserrata?	Mosaic	Wuchuan County.Guizhou Province	Ancient wild tree. more than one hundred years	Q4
GZ049	124	Wild tree	wild type	camellia remotiserrata?	Mosaic	Wuchuan County.Guizhou Province	Ancient wild tree. more than one hundred years	Q4
GZ050	126	Ancient landraces	cultivation type	Camellia sinensis	Mosaic	Huaxi District.Guizhou Province	Ancient cultivar shrub, more than one hundred years	Q4
GZ051	128	Modern landraces	cultivation type	Camellia sinensis	pure2	Huaxi District.Guizhou Province	landraces	Q2
GZ052	130	Ancient landraces	cultivation type	Camellia sinensis	Mosaic	Huaxi District.Guizhou Province	Ancient cultivar shrub, more than two hundred years	Q4
GZ053	131	Ancient landraces	cultivation type	Camellia sinensis	pure1	Huaxi District.Guizhou Province	Ancient cultivar shrub, more than two hundred years	Q1
GZ054	133	Ancient landraces	cultivation type	Camellia sinensis	Mosaic	Huaxi District.Guizhou Province	Ancient cultivar shrub, more than two hundred years	Q4
GZ055	134	Modern landraces	cultivation type	Camellia sinensis	pure2	Huaxi District.Guizhou Province	landraces	Q2
GZ056	136	Ancient landraces	cultivation type	Camellia sinensis	Mosaic	Duyun City.Guizhou Province	Ancient cultivar shrub, more than two hundred years	Q4
GZ057	137	Ancient landraces	cultivation type	Camellia sinensis	Mosaic	Duyun City.Guizhou Province	Ancient cultivar shrub, more than two hundred years	Q4
GZ058	138	Ancient landraces	cultivation type	Camellia sinensis	Mosaic	Duyun City.Guizhou Province	Ancient cultivar shrub, more than two hundred years	Q4
GZ059	139	Ancient landraces	cultivation type	Camellia sinensis	Mosaic	Duyun City.Guizhou Province	Ancient cultivar shrub, more than two hundred years	Q4
GZ060	141	Ancient landraces	cultivation type	Camellia sinensis	Mosaic	Duyun City.Guizhou Province	Ancient cultivar shrub, more than two hundred years	Q4
GZ061	146	Wild tree	wild type	Camellia tachangensis	Mosaic	Guiding County.Guizhou Province	Natural offsprings of Ancient wild tree	Q4
GZ062	148	Wild tree	wild type	Camellia tachangensis?	Mosaic	Guiding County.Guizhou Province	Natural offsprings of Ancient wild tree	Q4
GZ063	151	Wild tree	wild type	Camellia tachangensis	Mosaic	Guiding County.Guizhou Province	Natural offsprings of Ancient wild tree	Q4
GZ064	152	Wild tree	wild type	Camellia tachangensis	pure3	Guiding County.Guizhou Province	Natural offsprings of Ancient wild tree	Q3
GZ065	153	Wild tree	wild type	Camellia tachangensis	Mosaic	Guiding County.Guizhou Province	Natural offsprings of Ancient wild tree	Q4
GZ066	157	Wild tree	wild type	Camellia tachangensis	Mosaic	Guiding County.Guizhou Province	Natural offsprings of Ancient wild tree	Q4
GZ067	161	Wild tree	wild type	Camellia tachangensis	Mosaic	Guiding County.Guizhou Province	Natural offsprings of Ancient wild tree	Q4
GZ068	171	Modern landraces	cultivation type	Camellia sinensis	pure1	Yinjiang County.Guizhou Province	landraces	Q1
GZ069	172	Modern landraces	cultivation type	Camellia sinensis	Mosaic	Yinjiang County.Guizhou Province	landraces	Q4
GZ070	173	Modern landraces	cultivation type	Camellia sinensis	Mosaic	Yinjiang County.Guizhou Province	landraces	Q4
GZ071	177	Ancient landraces	cultivation type	Camellia sinensis	pure1	Dejiang County.Guizhou Province	Ancient cultivar shrub, more than two hundred years	Q1
GZ072	178	Modern landraces	cultivation type	Camellia sinensis	Mosaic	Yinjiang County.Guizhou Province	landraces	Q4
GZ073	186	Modern landraces	cultivation type	Camellia sinensis	pure1	Yinjiang County.Guizhou Province	landraces	Q1
GZ074	190	Wild tree	wild type	Camellia taliensis	Mosaic	Zhenfeng County.Guizhou Province	Ancient wild tree. more than one hundred years	Q4
GZ075	192	Ancient landraces	cultivation type	Camellia sinensis	pure1	Dejiang County.Guizhou Province	Ancient cultivar shrub, more than two hundred years	Q1
GZ076	193	Wild tree	wild type	Camellia tachangensis?	Mosaic	Guiding County.Guizhou Province	Ancient wild tree. more than one hundred years	Q4
GZ077	194	Ancient landraces	cultivation type	Camellia sinensis	Mosaic	Guiding County.Guizhou Province	Ancient cultivar shrub, more than two hundred years	Q4
GZ078	195	Ancient landraces	cultivation type	Camellia sinensis	pure1	Wuchuan County.Guizhou Province	Ancient cultivar shrub, more than two hundred years	Q1
GZ079	199	Ancient landraces	cultivation type	Camellia sinensis	pure1	Wuchuan County.Guizhou Province	Ancient cultivar shrub, more than two hundred years	Q1
GZ080	200	Ancient landraces	cultivation type	Camellia sinensis	pure1	Wuchuan County.Guizhou Province	Ancient cultivar shrub, more than two hundred years	Q1
GZ081	201	Ancient landraces	cultivation type	Camellia sinensis	pure1	Wuchuan County.Guizhou Province	Ancient cultivar shrub, more than two hundred years	Q1
GZ082	202	Ancient landraces	cultivation type	Camellia sinensis?	pure1	zheng'an County.Guizhou Province	Ancient cultivar shrub, more than two hundred years	Q1
GZ083	203	Wild tree	wild type	camellia remotiserrata?	Mosaic	zheng'an County.Guizhou Province	Ancient wild tree. more than one hundred years	Q4
GZ084	205	Ancient landraces	cultivation type	Camellia sinensis	Mosaic	Duyun City.Guizhou Province	Ancient cultivar shrub, more than one hundred years	Q4
GZ085	206	Ancient landraces	cultivation type	Camellia sinensis	pure1	Daozhen County.Guizhou Province	Ancient cultivar shrub, more than two hundred years	Q1
GZ086	210	Wild tree	wild type	camellia remotiserrata?	Mosaic	Wuchuan County.Guizhou Province	Ancient wild tree. more than one hundred years	Q4
GZ087	213	Wild tree	wild type	camellia remotiserrata?	Mosaic	Wuchuan County.Guizhou Province	Ancient wild tree. more than one hundred years	Q4
GZ088	217	Ancient landraces	cultivation type	Camellia sinensis	pure1	Puding County.Guizhou Province	Ancient cultivar shrub (tea King) around 1000 years?	Q1
GZ089	227	Wild tree	wild type	Camellia tachangensis	Mosaic	Guiding County.Guizhou Province	Natural offsprings of Ancient wild tree	Q4
GZ090	233	Ancient landraces	cultivation type	Camellia sinensis?	pure1	Zhenfeng County.Guizhou Province	Ancient cultivar shrub, more than two hundred years	Q1
GZ091	235	Wild tree	wild type	Camellia tachangensis	Mosaic	Zhenfeng County.Guizhou Province	Natural offsprings of Ancient wild tree	Q4
GZ092	237	Wild tree	wild type	Camellia tachangensis?	Mosaic	Zhenfeng County.Guizhou Province	Natural offsprings of Ancient wild tree	Q4
GZ093	239	Ancient landraces	cultivation type	Camellia sinensis	pure1	Zhenfeng County.Guizhou Province	Ancient cultivar shrub, more than two hundred years	Q1
GZ094	241	Wild tree	wild type	Camellia tachangensis	pure2	Zhenfeng County.Guizhou Province	Ancient wild tree. more than one hundred years	Q2
GZ095	244	Ancient landraces	cultivation type	Camellia sinensis	Mosaic	Zhenfeng County.Guizhou Province	Ancient cultivar shrub, more than two hundred years	Q4
GZ096	245	Wild tree	wild type	Camellia tachangensis	Mosaic	Zhenfeng County.Guizhou Province	Ancient wild tree. more than one hundred years	Q4
GZ097	249	Wild tree	wild type	Camellia tachangensis	pure3	Zhenfeng County.Guizhou Province	Ancient wild tree. more than one hundred years	Q3
GZ098	251	Wild tree	wild type	Camellia tachangensis	Mosaic	Zhenfeng County.Guizhou Province	Ancient wild tree. more than one hundred years	Q4
GZ099	252	Wild tree	wild type	Camellia tachangensis	Mosaic	Zhenfeng County.Guizhou Province	Ancient wild tree. more than one hundred years	Q4
GZ100	260	Ancient landraces	cultivation type	Camellia sinensis	pure1	Dejiang County.Guizhou Province	Ancient cultivar shrub, more than two hundred years	Q1
GZ101	263	Ancient landraces	cultivation type	Camellia sinensis	pure1	Dejiang County.Guizhou Province	Ancient cultivar shrub, more than two hundred years	Q1
GZ102	265	Ancient landraces	cultivation type	Camellia sinensis	Mosaic	Xingyi City.Guizhou Province	Ancient cultivar shrub, more than one hundred years	Q4
GZ103	267	Ancient landraces	cultivation type	Camellia sinensis	pure1	Xingyi City.Guizhou Province	Ancient cultivar shrub, more than one hundred years	Q1
GZ104	269	Ancient landraces	cultivation type	Camellia sinensis	pure1	Xingyi City.Guizhou Province	Ancient cultivar shrub, more than one hundred years	Q1
GZ105	270	Ancient landraces	cultivation type	Camellia sinensis	pure1	Guanling County.Guizhou Province	Ancient cultivar shrub, more than one hundred years	Q1
GZ106	273	Ancient landraces	cultivation type	Camellia sinensis	pure2	Xingyi City.Guizhou Province	Ancient cultivar shrub, more than five hundred years	Q2
GZ107	279	Wild tree	wild type	Camellia tachangensis	pure2	Xingyi City.Guizhou Province	Ancient wild tree. more than one hundred years	Q2
GZ108	280	Ancient landraces	cultivation type	Camellia sinensis?	pure1	Xingyi City.Guizhou Province	Ancient cultivar shrub, more than one hundred years	Q1
GZ109	281	Ancient landraces	cultivation type	Camellia sinensis?	pure1	Xingyi City.Guizhou Province	Ancient cultivar shrub, more than two hundred years	Q1
GZ110	282	Wild tree	wild type	Camellia taliensis	Mosaic	Xingyi City.Guizhou Province	Ancient wild tree. more than one hundred years	Q4
GZ111	284	Ancient landraces	cultivation type	Camellia sinensis?	Mosaic	Xingyi City.Guizhou Province	Ancient cultivar shrub, more than one hundred years	Q4
GZ112	286	Wild tree	wild type	Camellia tachangensis	Mosaic	Xingyi City.Guizhou Province	Ancient wild tree. more than one hundred years	Q4
GZ113	287	Wild tree	wild type	Camellia tachangensis	Mosaic	Xingyi City.Guizhou Province	Ancient wild tree. more than one hundred years	Q4
GZ114	292	Ancient landraces	cultivation type	Camellia sinensis	pure2	Xingyi City.Guizhou Province	Ancient cultivar shrub, more than two hundred years	Q2
GZ115	293	Modern landraces	cultivation type	Camellia sinensis	pure2	Duyun City.Guizhou Province	landraces	Q2
GZ116	294	Ancient landraces	cultivation type	Camellia sinensis	pure1	Xingyi City.Guizhou Province	Ancient cultivar shrub, more than two hundred years	Q1
GZ117	296	Modern landraces	cultivation type	Camellia sinensis	Mosaic	Shiqian County.Guizhou Province	landraces	Q4
GZ118	297	Modern landraces	cultivation type	Camellia sinensis	pure1	Shiqian County.Guizhou Province	landraces	Q1
GZ119	298	Modern landraces	cultivation type	Camellia sinensis	Mosaic	Shiqian County.Guizhou Province	landraces	Q4
GZ120	299	Modern landraces	cultivation type	Camellia sinensis	pure1	Shiqian County.Guizhou Province	landraces	Q1
GZ121	302	Modern landraces	cultivation type	Camellia sinensis	pure1	Shiqian County.Guizhou Province	landraces	Q1
GZ122	303	Modern landraces	cultivation type	Camellia sinensis	pure1	Shiqian County.Guizhou Province	landraces	Q1
GZ123	304	Modern landraces	cultivation type	Camellia sinensis	pure2	Shiqian County.Guizhou Province	landraces	Q2
GZ124	306	Modern landraces	cultivation type	Camellia sinensis	pure1	Shiqian County.Guizhou Province	landraces	Q1
GZ125	307	Modern landraces	cultivation type	Camellia sinensis	pure1	Shiqian County.Guizhou Province	landraces	Q1
GZ126	309	Wild tree	wild type	Camellia tachangensis	Mosaic	Xingyi City.Guizhou Province	Ancient wild tree. more than one hundred years	Q4
GZ127	311	Modern landraces	cultivation type	Camellia sinensis	pure1	Shiqian County.Guizhou Province	landraces	Q1
GZ128	314	Modern landraces	cultivation type	Camellia sinensis	pure1	Shiqian County.Guizhou Province	landraces	Q1
GZ129	316	Wild tree	wild type	Camellia tachangensis	Mosaic	Xingyi City.Guizhou Province	Ancient wild tree. more than one hundred years	Q4
GZ130	318	Ancient landraces	wild type	Camellia sinensis	Mosaic	Liping County.Guizhou Province	Ancient cultivar shrub, more than one hundred years	Q4
GZ131	319	Ancient landraces	cultivation type	Camellia sinensis	Mosaic	Liping County.Guizhou Province	Ancient cultivar shrub, more than one hundred years	Q4
GZ132	320	Ancient landraces	cultivation type	Camellia sinensis	Mosaic	Liping County.Guizhou Province	Ancient cultivar shrub, more than two hundred years	Q4
GZ133	323	Ancient landraces	cultivation type	Camellia sinensis	Mosaic	Liping County.Guizhou Province	Ancient cultivar shrub, more than two hundred years	Q4
GZ134	326	Ancient landraces	cultivation type	Camellia sinensis	Mosaic	Liping County.Guizhou Province	Ancient cultivar shrub, more than two hundred years	Q4
GZ135	329	Wild tree	wild type	Camellia taliensis?	Mosaic	Xingyi City.Guizhou Province	Ancient wild tree. more than one hundred years	Q4
GZ136	331	Ancient landraces	cultivation type	Camellia sinensis	pure1	Puding County.Guizhou Province	Ancient cultivar shrub, more than one hundred years	Q1
GZ137	333	Ancient landraces	cultivation type	Camellia sinensis	pure1	Puding County.Guizhou Province	Ancient cultivar shrub, more than one hundred years	Q1
GZ138	353	Ancient landraces	cultivation type	Camellia sinensis	Mosaic	Shuicheng County.Guizhou Province	Ancient cultivar shrub, more than one hundred years	Q4
GZ139	354	Ancient landraces	cultivation type	Camellia sinensis	pure2	Shuicheng County.Guizhou Province	Ancient cultivar shrub, more than one hundred years	Q2
GZ140	357	Wild tree	wild type	camellia remotiserrata?	Mosaic	Jinsha County.Guizhou Province	Ancient wild tree. more than one hundred years	Q4
GZ141	361	Ancient landraces	cultivation type	Camellia sinensis	pure1	Huishui County.Guizhou Province	Ancient cultivar shrub, more than two hundred years	Q1
GZ142	362	Wild tree	wild type	Camellia tachangensis?	Mosaic	Huishui County.Guizhou Province	Ancient wild tree. more than one hundred years	Q4
GZ143	363	Wild tree	wild type	Camellia tachangensis	pure3	Huishui County.Guizhou Province	Ancient wild tree. more than one hundred years	Q3
GZ144	364	Ancient landraces	cultivation type	Camellia sinensis	pure1	Huishui County.Guizhou Province	Ancient cultivar shrub, more than two hundred years	Q1
GZ145	365	Wild tree	wild type	camellia remotiserrata?	Mosaic	Wuchuan County.Guizhou Province	Ancient wild tree. more than one hundred years	Q4
GZ146	370	Ancient landraces	cultivation type	Camellia sinensis	pure1	Huishui County.Guizhou Province	Ancient cultivar shrub, more than two hundred years	Q1
GZ147	374	Ancient landraces	cultivation type	Camellia sinensis	Mosaic	Yanhe County.Guizhou Province	Ancient cultivar shrub, more than one hundred years	Q4
GZ148	375	Ancient landraces	cultivation type	Camellia sinensis	pure1	Yanhe County.Guizhou Province	Ancient cultivar shrub, more than one hundred years	Q1
GZ149	376	Ancient landraces	cultivation type	Camellia sinensis	pure1	Yanhe County.Guizhou Province	Ancient cultivar shrub, more than one hundred years	Q1
GZ150	377	Ancient landraces	cultivation type	camellia remotiserrata?	Mosaic	Yanhe County.Guizhou Province	Ancient cultivar shrub, more than one hundred years	Q4
GZ151	378	Ancient landraces	cultivation type	Camellia sinensis	pure1	Yanhe County.Guizhou Province	Ancient cultivar shrub, more than one hundred years	Q1
GZ152	379	Ancient landraces	cultivation type	Camellia sinensis	pure1	Yanhe County.Guizhou Province	Ancient cultivar shrub, more than one hundred years	Q1
GZ153	380	Ancient landraces	cultivation type	Camellia sinensis	pure1	Yanhe County.Guizhou Province	Ancient cultivar shrub, more than one hundred years	Q1
GZ154	381	Ancient landraces	cultivation type	Camellia sinensis	pure1	Yanhe County.Guizhou Province	Ancient cultivar shrub, more than one hundred years	Q1
GZ155	382	Ancient landraces	cultivation type	Camellia sinensis	pure1	Shuicheng County.Guizhou Province	Ancient cultivar shrub, more than one hundred years	Q1
GZ156	383	Ancient landraces	cultivation type	Camellia sinensis	Mosaic	Liuzhi County.Guizhou Province	Ancient cultivar shrub, more than one hundred years	Q4
GZ157	385	Ancient landraces	cultivation type	Camellia sinensis	Mosaic	Yanhe County.Guizhou Province	Ancient cultivar shrub, more than one hundred years	Q4
GZ158	386	Ancient landraces	cultivation type	Camellia sinensis	pure1	Yanhe County.Guizhou Province	Ancient cultivar shrub, more than one hundred years	Q1
GZ159	387	Ancient landraces	cultivation type	Camellia sinensis	pure1	Yanhe County.Guizhou Province	Ancient cultivar shrub, more than one hundred years	Q1
GZ160	388	Ancient landraces	cultivation type	Camellia sinensis	Mosaic	Yanhe County.Guizhou Province	Ancient cultivar shrub, more than two hundred years	Q4
GZ161	389	Ancient landraces	cultivation type	Camellia sinensis	pure1	Yanhe County.Guizhou Province	Ancient cultivar shrub, more than one hundred years	Q1
GZ162	390	Wild tree	wild type	Camellia tachangensis	pure3	Huishui County.Guizhou Province	Ancient wild tree. more than two hundred years	Q3
GZ163	391	Ancient landraces	cultivation type	Camellia sinensis	pure1	Huishui County.Guizhou Province	Ancient cultivar shrub, more than two hundred years	Q1
GZ164	393	Ancient landraces	cultivation type	Camellia sinensis	Mosaic	Yanhe County.Guizhou Province	Ancient cultivar shrub, more than one hundred years	Q4
GZ165	395	Ancient landraces	cultivation type	Camellia sinensis	pure1	Yanhe County.Guizhou Province	Ancient cultivar shrub, more than two hundred years	Q1
GZ166	398	Wild tree	wild type	camellia remotiserrata?	Mosaic	Tongzi County.Guizhou Province	Ancient wild tree. more than two hundred years	Q4
GZ167	399	Ancient landraces	cultivation type	Camellia sinensis	pure1	Yanhe County.Guizhou Province	Ancient cultivar shrub, more than four hundred years	Q1
GZ168	400	Ancient landraces	cultivation type	Camellia sinensis	Mosaic	Liuzhi County.Guizhou Province	Ancient cultivar shrub, more than one hundred years	Q4
GZ169	401	Wild tree	wild type	camellia remotiserrata?	pure3	Wuchuan County.Guizhou Province	Ancient wild tree. more than two hundred years	Q3
GZ170	402	Ancient landraces	cultivation type	Camellia sinensis	pure1	Yanhe County.Guizhou Province	Ancient cultivar shrub, more than one hundred years	Q1
GZ171	404	Wild tree	wild type	camellia remotiserrata?	Mosaic	Chishui County.Guizhou Province	Ancient wild tree. more than one hundred years	Q4
GZ172	407	Ancient landraces	cultivation type	Camellia sinensis	Mosaic	Renhuai County.Guizhou Province	Ancient cultivar shrub, more than one hundred years	Q4
GZ173	410	Ancient landraces	cultivation type	Camellia sinensis	Mosaic	Qinglong County.Guizhou Province	Ancient cultivar shrub, more than one hundred years	Q4
GZ174	411	Ancient landraces	cultivation type	Camellia sinensis	pure1	Shuicheng County.Guizhou Province	Ancient cultivar shrub, more than three hundred years	Q1
GZ175	415	Wild tree	wild type	Camellia tachangensis	Mosaic	Yanhe County.Guizhou Province	Ancient wild tree. more than one hundred years	Q4
GZ176	419	Wild tree	wild type	camellia remotiserrata?	Mosaic	Xishui County.Guizhou Province	Ancient wild tree. more than two hundred years	Q4
GZ177	420	Ancient landraces	cultivation type	camellia remotiserrata?	pure1	Jinsha County.Guizhou Province	Ancient cultivar shrub, more than one hundred years	Q1
GZ178	422	Modern landraces	cultivation type	Camellia sinensis	pure2	Zhijin County.Guizhou Province	landraces	Q2
GZ179	424	Wild tree	wild type	camellia remotiserrata?	pure3	Wuchuan County.Guizhou Province	Ancient wild tree. more than two hundred years	Q3
GZ180	425	Ancient landraces	cultivation type	camellia remotiserrata?	pure1	Jinsha County.Guizhou Province	Ancient cultivar shrub, more than one hundred years	Q1
GZ181	426	Wild tree	wild type	camellia remotiserrata?	Mosaic	Jinsha County.Guizhou Province	Ancient wild tree. more than two hundred years	Q4
GZ182	427	Ancient landraces	cultivation type	Camellia sinensis	pure1	Xishui County.Guizhou Province	Ancient cultivar shrub, more than one hundred years	Q1
GZ183	430	Ancient landraces	cultivation type	Camellia sinensis	pure1	Chishui County.Guizhou Province	Ancient cultivar shrub, more than one hundred years	Q1
GZ184	431	Wild tree	wild type	camellia remotiserrata?	Mosaic	Renhuai County.Guizhou Province	Ancient wild tree. more than one hundred years	Q4
GZ185	432	Wild tree	wild type	camellia remotiserrata?	Mosaic	Daozhen County.Guizhou Province	Ancient wild tree. more than three hundred years	Q4
GZ186	433	Wild tree	wild type	camellia remotiserrata?	Mosaic	Wuchuan County.Guizhou Province	Ancient wild tree. more than one hundred years	Q4
GZ187	435	Wild tree	wild type	Camellia tachangensis	pure3	Wuchuan County.Guizhou Province	Ancient wild tree. more than one hundred years	Q3
GZ188	438	Ancient landraces	cultivation type	Camellia sinensis	pure1	Xishui County.Guizhou Province	Ancient cultivar shrub, more than one hundred years	Q1
GZ189	445	Ancient landraces	cultivation type	Camellia sinensis	pure1	Yanhe County.Guizhou Province	Ancient cultivar shrub, more than one hundred years	Q1
GZ190	446	Ancient landraces	cultivation type	Camellia sinensis	pure1	Yanhe County.Guizhou Province	Ancient cultivar shrub, more than one hundred years	Q1
GZ191	448	Ancient landraces	cultivation type	Camellia sinensis	pure1	Tongzi County.Guizhou Province	Ancient cultivar shrub, more than one hundred years	Q1
GZ192	449	Ancient landraces	cultivation type	Camellia sinensis	pure1	Yanhe County.Guizhou Province	Ancient cultivar shrub, more than one hundred years	Q1
GZ193	454	Modern landraces	cultivation type	Camellia sinensis	pure2	Daozhen County.Guizhou Province	landraces	Q2
GZ194	455	Ancient landraces	cultivation type	Camellia sinensis	Mosaic	Shuicheng County.Guizhou Province	Ancient cultivar shrub, more than five hundred years	Q4
GZ195	457	Ancient landraces	cultivation type	Camellia sinensis	Mosaic	Liuzhi County.Guizhou Province	Ancient cultivar shrub, around six hundred years	Q4
GZ196	458	Ancient landraces	cultivation type	Camellia sinensis	pure1	Jinsha County.Guizhou Province	Ancient cultivar shrub, more than one hundred years	Q1
GZ197	460	Wild tree	wild type	camellia remotiserrata?	Mosaic	Jinsha County.Guizhou Province	Ancient wild tree. more than one hundred years	Q4
GZ198	462	Wild tree	wild type	Camellia tachangensis	Mosaic	Xingyi City.Guizhou Province	Ancient wild tree. more than three hundred years	Q4
GZ199	463	Ancient landraces	cultivation type	Camellia sinensis	pure1	Zhijin County.Guizhou Province	Ancient cultivar shrub, more than one hundred years	Q1
GZ200	465	Ancient landraces	cultivation type	Camellia sinensis	pure1	Chishui County.Guizhou Province	Ancient cultivar shrub, more than one hundred years	Q1
GZ201	466	Wild tree	wild type	camellia remotiserrata?	Mosaic	Jinsha County.Guizhou Province	Ancient wild tree. more than one hundred years	Q4
GZ202	467	Ancient landraces	cultivation type	Camellia sinensis	pure1	Chishui County.Guizhou Province	Ancient cultivar shrub, more than one hundred years	Q1
GZ203	468	Modern landraces	cultivation type	Camellia sinensis	pure2	Jinsha County.Guizhou Province	landraces	Q2
GZ204	469	Modern landraces	cultivation type	Camellia sinensis	pure2	Qixingguan District.Guizhou Province	landraces	Q2
GZ205	480	Modern landraces	cultivation type	Camellia sinensis	pure2	Qixingguan District.Guizhou Province	landraces	Q2
GZ206	484	Wild tree	wild type	Camellia tachangensis	Mosaic	Qixingguan District.Guizhou Province	Ancient wild tree. more than one hundred years	Q4
GZ207	485	Ancient landraces	cultivation type	Camellia sinensis	pure1	Jinsha County.Guizhou Province	Ancient cultivar shrub, more than one hundred years	Q1
GZ208	540	breeding variety	cultivation type	Camellia sinensis	pure2	Fujian Province	Variety	Q2
GZ209	541	breeding variety	cultivation type	Camellia sinensis	pure2	Zhejiang Province	Variety	Q2
GZ210	N10	breeding variety	cultivation type	Camellia sinensis	Mosaic	Guizhou Province	Variety	Q4
GZ211	N8	Ancient landraces	cultivation type	Camellia sinensis	Mosaic	Huaxi District.Guizhou Province	Ancient cultivar shrub, more than two hundred years	Q4
GZ212	N9	Ancient landraces	cultivation type	Camellia sinensis	Mosaic	Huaxi District.Guizhou Province	Ancient cultivar shrub, more than two hundred years	Q4
