# Supplementary material for: Genome-wide association studies reveal potential candidate genes associated with amino acid in tea plants
Source: PeerJ. 2025 Mar 4;13:e18969. doi: 10.7717/peerj.18969 (PMC11887564; doi:10.7717/peerj.18969)
Supplement: Table S2 [file peerj-13-18969-s005.xlsx]

## Sheet: Sheet1
Table S2. Distribution information of 78,819 SNPs on 15 chromosomes of tea plants
SNPs	Chromosome	Position
S1_161560	1	161560
S1_161582	1	161582
S1_161588	1	161588
S1_161594	1	161594
S1_161598	1	161598
S1_161609	1	161609
S1_161621	1	161621
S1_161622	1	161622
S1_161638	1	161638
S1_161896	1	161896
S1_161931	1	161931
S1_884031	1	884031
S1_884061	1	884061
S1_884304	1	884304
S1_1076408	1	1076408
S1_1076655	1	1076655
S1_1076660	1	1076660
S1_1076705	1	1076705
S1_1076715	1	1076715
S1_1101914	1	1101914
S1_1101925	1	1101925
S1_1101939	1	1101939
S1_1101965	1	1101965
S1_1101981	1	1101981
S1_1101983	1	1101983
S1_1147468	1	1147468
S1_1147477	1	1147477
S1_1147489	1	1147489
S1_1147497	1	1147497
S1_1147572	1	1147572
S1_1147574	1	1147574
S1_1167994	1	1167994
S1_1168029	1	1168029
S1_1168043	1	1168043
S1_1168058	1	1168058
S1_1305765	1	1305765
S1_1307328	1	1307328
S1_1307364	1	1307364
S1_1307628	1	1307628
S1_1307632	1	1307632
S1_1307641	1	1307641
S1_1461334	1	1461334
S1_1461337	1	1461337
S1_1461406	1	1461406
S1_1461411	1	1461411
S1_1692219	1	1692219
S1_1692247	1	1692247
S1_1692251	1	1692251
S1_1692261	1	1692261
S1_1692270	1	1692270
S1_1692288	1	1692288
S1_1692310	1	1692310
S1_1708140	1	1708140
S1_2200491	1	2200491
S1_2200592	1	2200592
S1_2226955	1	2226955
S1_2226982	1	2226982
S1_2226992	1	2226992
S1_2315355	1	2315355
S1_2315427	1	2315427
S1_2315603	1	2315603
S1_2315625	1	2315625
S1_2418636	1	2418636
S1_2482776	1	2482776
S1_2482948	1	2482948
S1_2502296	1	2502296
S1_2502298	1	2502298
S1_2510522	1	2510522
S1_2717842	1	2717842
S1_2840498	1	2840498
S1_2840517	1	2840517
S1_2882830	1	2882830
S1_2882942	1	2882942
S1_2995769	1	2995769
S1_2995805	1	2995805
S1_2995822	1	2995822
S1_3645335	1	3645335
S1_3645551	1	3645551
S1_3645571	1	3645571
S1_3645750	1	3645750
S1_3645798	1	3645798
S1_3928388	1	3928388
S1_3928393	1	3928393
S1_3928558	1	3928558
S1_3941642	1	3941642
S1_4083681	1	4083681
S1_4083774	1	4083774
S1_4083787	1	4083787
S1_4107091	1	4107091
S1_4361890	1	4361890
S1_4361920	1	4361920
S1_4361924	1	4361924
S1_4630707	1	4630707
S1_4630746	1	4630746
S1_4630772	1	4630772
S1_4863390	1	4863390
S1_4870620	1	4870620
S1_4870835	1	4870835
S1_4890079	1	4890079
S1_4890148	1	4890148
S1_4910267	1	4910267
S1_4921231	1	4921231
S1_4921232	1	4921232
S1_4921251	1	4921251
S1_4921257	1	4921257
S1_4950750	1	4950750
S1_4950798	1	4950798
S1_4950799	1	4950799
S1_4999298	1	4999298
S1_4999333	1	4999333
S1_4999483	1	4999483
S1_5158687	1	5158687
S1_5158721	1	5158721
S1_5207898	1	5207898
S1_5207915	1	5207915
S1_5207920	1	5207920
S1_5320651	1	5320651
S1_5320855	1	5320855
S1_5364472	1	5364472
S1_5364504	1	5364504
S1_5364513	1	5364513
S1_5364542	1	5364542
S1_5364567	1	5364567
S1_5366680	1	5366680
S1_5582978	1	5582978
S1_5582995	1	5582995
S1_5583012	1	5583012
S1_5767056	1	5767056
S1_5767108	1	5767108
S1_5767132	1	5767132
S1_5767291	1	5767291
S1_6009065	1	6009065
S1_6009066	1	6009066
S1_6009106	1	6009106
S1_6009108	1	6009108
S1_6020539	1	6020539
S1_6020548	1	6020548
S1_6020576	1	6020576
S1_6020747	1	6020747
S1_6020763	1	6020763
S1_6020800	1	6020800
S1_6020809	1	6020809
S1_6020815	1	6020815
S1_6020838	1	6020838
S1_6020850	1	6020850
S1_6228328	1	6228328
S1_6287095	1	6287095
S1_6288497	1	6288497
S1_6288529	1	6288529
S1_6288530	1	6288530
S1_6440255	1	6440255
S1_6440266	1	6440266
S1_6440291	1	6440291
S1_6440292	1	6440292
S1_6525522	1	6525522
S1_6584771	1	6584771
S1_6584784	1	6584784
S1_6585021	1	6585021
S1_6585092	1	6585092
S1_6649518	1	6649518
S1_6649527	1	6649527
S1_6649529	1	6649529
S1_7178406	1	7178406
S1_7472221	1	7472221
S1_7472223	1	7472223
S1_7472336	1	7472336
S1_7472355	1	7472355
S1_7472366	1	7472366
S1_7472369	1	7472369
S1_7472380	1	7472380
S1_7472384	1	7472384
S1_7472398	1	7472398
S1_7472417	1	7472417
S1_7472430	1	7472430
S1_7472435	1	7472435
S1_7472443	1	7472443
S1_7472447	1	7472447
S1_7472450	1	7472450
S1_7558093	1	7558093
S1_7558125	1	7558125
S1_7558139	1	7558139
S1_7630278	1	7630278
S1_7630308	1	7630308
S1_7630315	1	7630315
S1_7630350	1	7630350
S1_7630549	1	7630549
S1_7630556	1	7630556
S1_7727431	1	7727431
S1_7735981	1	7735981
S1_7737257	1	7737257
S1_7737279	1	7737279
S1_7737284	1	7737284
S1_7737323	1	7737323
S1_7737701	1	7737701
S1_7763713	1	7763713
S1_7763769	1	7763769
S1_7845501	1	7845501
S1_7845503	1	7845503
S1_7886117	1	7886117
S1_8049415	1	8049415
S1_8049607	1	8049607
S1_8049633	1	8049633
S1_8226264	1	8226264
S1_8226305	1	8226305
S1_8226335	1	8226335
S1_8226373	1	8226373
S1_8226401	1	8226401
S1_8226402	1	8226402
S1_8336272	1	8336272
S1_8336284	1	8336284
S1_8374570	1	8374570
S1_8374577	1	8374577
S1_8374878	1	8374878
S1_8374896	1	8374896
S1_8374967	1	8374967
S1_8406890	1	8406890
S1_8406929	1	8406929
S1_8406935	1	8406935
S1_8406982	1	8406982
S1_8406985	1	8406985
S1_8435903	1	8435903
S1_8435919	1	8435919
S1_8435926	1	8435926
S1_8435950	1	8435950
S1_8548630	1	8548630
S1_8548649	1	8548649
S1_8548872	1	8548872
S1_8663187	1	8663187
S1_8702379	1	8702379
S1_8749945	1	8749945
S1_8750006	1	8750006
S1_8750007	1	8750007
S1_8750015	1	8750015
S1_9032194	1	9032194
S1_9032214	1	9032214
S1_9032215	1	9032215
S1_9032223	1	9032223
S1_9032225	1	9032225
S1_9032231	1	9032231
S1_9032236	1	9032236
S1_9032239	1	9032239
S1_9032241	1	9032241
S1_9032261	1	9032261
S1_9032262	1	9032262
S1_9032267	1	9032267
S1_9032275	1	9032275
S1_9032276	1	9032276
S1_9032283	1	9032283
S1_9032303	1	9032303
S1_9074250	1	9074250
S1_9493546	1	9493546
S1_9493564	1	9493564
S1_9493801	1	9493801
S1_9664313	1	9664313
S1_9664346	1	9664346
S1_9664386	1	9664386
S1_10309500	1	10309500
S1_10309507	1	10309507
S1_10656268	1	10656268
S1_10656278	1	10656278
S1_11352238	1	11352238
S1_11352281	1	11352281
S1_11352283	1	11352283
S1_11352306	1	11352306
S1_11352313	1	11352313
S1_11352331	1	11352331
S1_11593957	1	11593957
S1_11594093	1	11594093
S1_11594131	1	11594131
S1_11669803	1	11669803
S1_11669821	1	11669821
S1_11669902	1	11669902
S1_11721185	1	11721185
S1_11721192	1	11721192
S1_11721360	1	11721360
S1_11805696	1	11805696
S1_11805703	1	11805703
S1_11805792	1	11805792
S1_11806025	1	11806025
S1_11806036	1	11806036
S1_11806054	1	11806054
S1_11806059	1	11806059
S1_11806063	1	11806063
S1_11806065	1	11806065
S1_11808732	1	11808732
S1_11808735	1	11808735
S1_11808751	1	11808751
S1_11808754	1	11808754
S1_11808758	1	11808758
S1_11808789	1	11808789
S1_11808801	1	11808801
S1_11808805	1	11808805
S1_11808952	1	11808952
S1_11808954	1	11808954
S1_11808963	1	11808963
S1_11886396	1	11886396
S1_11886403	1	11886403
S1_11886447	1	11886447
S1_11916325	1	11916325
S1_12962525	1	12962525
S1_12962526	1	12962526
S1_12962542	1	12962542
S1_12962566	1	12962566
S1_12962585	1	12962585
S1_12962604	1	12962604
S1_12962800	1	12962800
S1_13196011	1	13196011
S1_13196031	1	13196031
S1_13196043	1	13196043
S1_13196062	1	13196062
S1_13196071	1	13196071
S1_13196085	1	13196085
S1_13196109	1	13196109
S1_13196116	1	13196116
S1_13196119	1	13196119
S1_13196154	1	13196154
S1_13196204	1	13196204
S1_13196220	1	13196220
S1_13196256	1	13196256
S1_13196265	1	13196265
S1_13196462	1	13196462
S1_13196512	1	13196512
S1_13424751	1	13424751
S1_13424760	1	13424760
S1_13429138	1	13429138
S1_13429181	1	13429181
S1_13429203	1	13429203
S1_13429227	1	13429227
S1_13429231	1	13429231
S1_13429373	1	13429373
S1_13429434	1	13429434
S1_13429456	1	13429456
S1_13429478	1	13429478
S1_13683511	1	13683511
S1_13683514	1	13683514
S1_13781961	1	13781961
S1_13781968	1	13781968
S1_13782014	1	13782014
S1_13782015	1	13782015
S1_13782021	1	13782021
S1_13782034	1	13782034
S1_13782038	1	13782038
S1_14869263	1	14869263
S1_14869267	1	14869267
S1_14869282	1	14869282
S1_14869290	1	14869290
S1_15115557	1	15115557
S1_15115605	1	15115605
S1_15115725	1	15115725
S1_15115735	1	15115735
S1_15115746	1	15115746
S1_15115764	1	15115764
S1_15223307	1	15223307
S1_15223321	1	15223321
S1_15223325	1	15223325
S1_15304127	1	15304127
S1_15370729	1	15370729
S1_15370810	1	15370810
S1_15408790	1	15408790
S1_15408815	1	15408815
S1_15408826	1	15408826
S1_15408829	1	15408829
S1_15408830	1	15408830
S1_15408837	1	15408837
S1_15408841	1	15408841
S1_15410803	1	15410803
S1_15410818	1	15410818
S1_15410821	1	15410821
S1_15481939	1	15481939
S1_15481950	1	15481950
S1_15481979	1	15481979
S1_15482010	1	15482010
S1_15482021	1	15482021
S1_15514241	1	15514241
S1_15514452	1	15514452
S1_15514494	1	15514494
S1_15514545	1	15514545
S1_15514566	1	15514566
S1_15666684	1	15666684
S1_15666689	1	15666689
S1_16509790	1	16509790
S1_16509818	1	16509818
S1_16509824	1	16509824
S1_16509828	1	16509828
S1_16509830	1	16509830
S1_16509838	1	16509838
S1_16509846	1	16509846
S1_16509860	1	16509860
S1_16509876	1	16509876
S1_16509889	1	16509889
S1_16519830	1	16519830
S1_16519929	1	16519929
S1_16519953	1	16519953
S1_16520002	1	16520002
S1_16691738	1	16691738
S1_16846627	1	16846627
S1_16846862	1	16846862
S1_17106791	1	17106791
S1_17271929	1	17271929
S1_17271947	1	17271947
S1_17271956	1	17271956
S1_17272097	1	17272097
S1_17673768	1	17673768
S1_17688213	1	17688213
S1_17688265	1	17688265
S1_17688410	1	17688410
S1_17723993	1	17723993
S1_17724011	1	17724011
S1_17724149	1	17724149
S1_17724180	1	17724180
S1_17724246	1	17724246
S1_17810141	1	17810141
S1_17810155	1	17810155
S1_17810178	1	17810178
S1_17810217	1	17810217
S1_17810218	1	17810218
S1_17829444	1	17829444
S1_17829447	1	17829447
S1_17922017	1	17922017
S1_17922044	1	17922044
S1_17922048	1	17922048
S1_17922051	1	17922051
S1_17922054	1	17922054
S1_17922057	1	17922057
S1_17950471	1	17950471
S1_17950478	1	17950478
S1_17980603	1	17980603
S1_18110672	1	18110672
S1_18143086	1	18143086
S1_18143137	1	18143137
S1_18143152	1	18143152
S1_18143163	1	18143163
S1_18232329	1	18232329
S1_18232497	1	18232497
S1_18232541	1	18232541
S1_18232566	1	18232566
S1_18232602	1	18232602
S1_18422227	1	18422227
S1_18855401	1	18855401
S1_18855654	1	18855654
S1_18855693	1	18855693
S1_18875820	1	18875820
S1_18875846	1	18875846
S1_18875858	1	18875858
S1_18875880	1	18875880
S1_18955328	1	18955328
S1_19013032	1	19013032
S1_19013324	1	19013324
S1_19013325	1	19013325
S1_19013349	1	19013349
S1_19268441	1	19268441
S1_19268449	1	19268449
S1_19268595	1	19268595
S1_19268631	1	19268631
S1_19531804	1	19531804
S1_19532104	1	19532104
S1_19542668	1	19542668
S1_19542684	1	19542684
S1_19542721	1	19542721
S1_19615126	1	19615126
S1_19957260	1	19957260
S1_20091494	1	20091494
S1_20091538	1	20091538
S1_20091586	1	20091586
S1_20111698	1	20111698
S1_20111699	1	20111699
S1_20111707	1	20111707
S1_20111717	1	20111717
S1_20111739	1	20111739
S1_20111753	1	20111753
S1_20111779	1	20111779
S1_20211611	1	20211611
S1_20211862	1	20211862
S1_20215259	1	20215259
S1_20215301	1	20215301
S1_20215364	1	20215364
S1_20563856	1	20563856
S1_20563877	1	20563877
S1_20563882	1	20563882
S1_20563896	1	20563896
S1_20563907	1	20563907
S1_20563908	1	20563908
S1_20665914	1	20665914
S1_20665917	1	20665917
S1_20823120	1	20823120
S1_20823128	1	20823128
S1_20823156	1	20823156
S1_20823166	1	20823166
S1_20823182	1	20823182
S1_20823193	1	20823193
S1_20823369	1	20823369
S1_20823403	1	20823403
S1_20823423	1	20823423
S1_20823428	1	20823428
S1_20916703	1	20916703
S1_20916889	1	20916889
S1_20916901	1	20916901
S1_20916910	1	20916910
S1_20916922	1	20916922
S1_21143102	1	21143102
S1_21273299	1	21273299
S1_21301440	1	21301440
S1_21301470	1	21301470
S1_21335588	1	21335588
S1_21335606	1	21335606
S1_21335823	1	21335823
S1_21356878	1	21356878
S1_21356945	1	21356945
S1_21424162	1	21424162
S1_21424164	1	21424164
S1_21446792	1	21446792
S1_21446926	1	21446926
S1_21446967	1	21446967
S1_21447037	1	21447037
S1_21456462	1	21456462
S1_21456472	1	21456472
S1_21456477	1	21456477
S1_21456482	1	21456482
S1_21456488	1	21456488
S1_21456505	1	21456505
S1_21456512	1	21456512
S1_21456538	1	21456538
S1_21834065	1	21834065
S1_21938148	1	21938148
S1_21938170	1	21938170
S1_21938193	1	21938193
S1_21938197	1	21938197
S1_21938227	1	21938227
S1_22787107	1	22787107
S1_22787123	1	22787123
S1_22787143	1	22787143
S1_22834690	1	22834690
S1_22834700	1	22834700
S1_22834710	1	22834710
S1_22834908	1	22834908
S1_22834920	1	22834920
S1_22834959	1	22834959
S1_22834983	1	22834983
S1_22834986	1	22834986
S1_22920635	1	22920635
S1_22920656	1	22920656
S1_22920703	1	22920703
S1_22920732	1	22920732
S1_22920951	1	22920951
S1_23535918	1	23535918
S1_23535920	1	23535920
S1_23536062	1	23536062
S1_23536124	1	23536124
S1_23565478	1	23565478
S1_23565481	1	23565481
S1_23565482	1	23565482
S1_23565701	1	23565701
S1_23565705	1	23565705
S1_23636034	1	23636034
S1_23636048	1	23636048
S1_23659618	1	23659618
S1_23659696	1	23659696
S1_23659712	1	23659712
S1_23659732	1	23659732
S1_23659751	1	23659751
S1_23714870	1	23714870
S1_23714933	1	23714933
S1_23729936	1	23729936
S1_23729952	1	23729952
S1_23838609	1	23838609
S1_23838642	1	23838642
S1_23838703	1	23838703
S1_23838704	1	23838704
S1_23973496	1	23973496
S1_23973586	1	23973586
S1_23973603	1	23973603
S1_24017681	1	24017681
S1_24048169	1	24048169
S1_24048175	1	24048175
S1_24048219	1	24048219
S1_24048229	1	24048229
S1_24048236	1	24048236
S1_24048245	1	24048245
S1_24048248	1	24048248
S1_24048251	1	24048251
S1_24188894	1	24188894
S1_24189085	1	24189085
S1_24189092	1	24189092
S1_24189116	1	24189116
S1_24189169	1	24189169
S1_24211009	1	24211009
S1_24211010	1	24211010
S1_24211242	1	24211242
S1_24403398	1	24403398
S1_24403419	1	24403419
S1_25223104	1	25223104
S1_25223111	1	25223111
S1_25223114	1	25223114
S1_25223169	1	25223169
S1_25223181	1	25223181
S1_25330997	1	25330997
S1_25331014	1	25331014
S1_25331082	1	25331082
S1_25331244	1	25331244
S1_25331303	1	25331303
S1_25504855	1	25504855
S1_25504857	1	25504857
S1_25691427	1	25691427
S1_25691455	1	25691455
S1_25691462	1	25691462
S1_25691468	1	25691468
S1_25691479	1	25691479
S1_25691496	1	25691496
S1_25691505	1	25691505
S1_25691509	1	25691509
S1_25835654	1	25835654
S1_25835656	1	25835656
S1_25835671	1	25835671
S1_25850938	1	25850938
S1_25850940	1	25850940
S1_25893298	1	25893298
S1_25893394	1	25893394
S1_25949789	1	25949789
S1_25949790	1	25949790
S1_25949792	1	25949792
S1_25949806	1	25949806
S1_25949809	1	25949809
S1_26006691	1	26006691
S1_26040349	1	26040349
S1_26040400	1	26040400
S1_26040442	1	26040442
S1_26094044	1	26094044
S1_26094045	1	26094045
S1_26094069	1	26094069
S1_26094071	1	26094071
S1_26094254	1	26094254
S1_26099947	1	26099947
S1_26112223	1	26112223
S1_26154189	1	26154189
S1_26154200	1	26154200
S1_26154223	1	26154223
S1_26154226	1	26154226
S1_26154234	1	26154234
S1_26190405	1	26190405
S1_26190442	1	26190442
S1_26224511	1	26224511
S1_26288710	1	26288710
S1_26492449	1	26492449
S1_26492775	1	26492775
S1_26617652	1	26617652
S1_26617718	1	26617718
S1_26621250	1	26621250
S1_26621251	1	26621251
S1_26621253	1	26621253
S1_26621259	1	26621259
S1_26621274	1	26621274
S1_26700192	1	26700192
S1_26710628	1	26710628
S1_26733375	1	26733375
S1_26735416	1	26735416
S1_26735434	1	26735434
S1_26735441	1	26735441
S1_26735501	1	26735501
S1_26905917	1	26905917
S1_26906052	1	26906052
S1_26959760	1	26959760
S1_26969977	1	26969977
S1_26969991	1	26969991
S1_26969994	1	26969994
S1_26970066	1	26970066
S1_26970072	1	26970072
S1_27012354	1	27012354
S1_27205809	1	27205809
S1_27205820	1	27205820
S1_27205846	1	27205846
S1_27205849	1	27205849
S1_27205880	1	27205880
S1_27265283	1	27265283
S1_27265284	1	27265284
S1_27265294	1	27265294
S1_27265296	1	27265296
S1_27265316	1	27265316
S1_27265332	1	27265332
S1_27265341	1	27265341
S1_27265358	1	27265358
S1_27265359	1	27265359
S1_27270348	1	27270348
S1_27270355	1	27270355
S1_27270403	1	27270403
S1_27270405	1	27270405
S1_27293732	1	27293732
S1_27972393	1	27972393
S1_27972405	1	27972405
S1_28087386	1	28087386
S1_28134614	1	28134614
S1_28134917	1	28134917
S1_28134951	1	28134951
S1_28175261	1	28175261
S1_28175275	1	28175275
S1_28175332	1	28175332
S1_28175334	1	28175334
S1_28175335	1	28175335
S1_28175349	1	28175349
S1_28848057	1	28848057
S1_28967395	1	28967395
S1_28967436	1	28967436
S1_29013501	1	29013501
S1_29193211	1	29193211
S1_29193240	1	29193240
S1_29193254	1	29193254
S1_29231899	1	29231899
S1_29231918	1	29231918
S1_29231920	1	29231920
S1_29231929	1	29231929
S1_29247823	1	29247823
S1_29247835	1	29247835
S1_29247841	1	29247841
S1_29247854	1	29247854
S1_29247871	1	29247871
S1_29247872	1	29247872
S1_29247878	1	29247878
S1_29247884	1	29247884
S1_29247889	1	29247889
S1_29247896	1	29247896
S1_29247965	1	29247965
S1_29247968	1	29247968
S1_29247977	1	29247977
S1_29248026	1	29248026
S1_29248030	1	29248030
S1_29248031	1	29248031
S1_29362134	1	29362134
S1_29362170	1	29362170
S1_29362176	1	29362176
S1_29362210	1	29362210
S1_29384507	1	29384507
S1_29389897	1	29389897
S1_29389908	1	29389908
S1_29389919	1	29389919
S1_29390216	1	29390216
S1_29753713	1	29753713
S1_29849283	1	29849283
S1_29849295	1	29849295
S1_29925700	1	29925700
S1_29925763	1	29925763
S1_29925772	1	29925772
S1_29930262	1	29930262
S1_29930333	1	29930333
S1_30108634	1	30108634
S1_30108657	1	30108657
S1_30131604	1	30131604
S1_30131639	1	30131639
S1_30131661	1	30131661
S1_30131664	1	30131664
S1_30131669	1	30131669
S1_30131670	1	30131670
S1_30264001	1	30264001
S1_30264002	1	30264002
S1_30264024	1	30264024
S1_30264060	1	30264060
S1_30264067	1	30264067
S1_30264068	1	30264068
S1_30264271	1	30264271
S1_30264275	1	30264275
S1_30264313	1	30264313
S1_30264319	1	30264319
S1_30264331	1	30264331
S1_30264352	1	30264352
S1_30389814	1	30389814
S1_30400514	1	30400514
S1_30400572	1	30400572
S1_30400602	1	30400602
S1_30400653	1	30400653
S1_30400830	1	30400830
S1_30400845	1	30400845
S1_30400891	1	30400891
S1_30471860	1	30471860
S1_30471904	1	30471904
S1_30471915	1	30471915
S1_30549026	1	30549026
S1_30549028	1	30549028
S1_30549032	1	30549032
S1_30549036	1	30549036
S1_30549051	1	30549051
S1_30608905	1	30608905
S1_30608936	1	30608936
S1_30609142	1	30609142
S1_30609143	1	30609143
S1_30609144	1	30609144
S1_30609146	1	30609146
S1_30650017	1	30650017
S1_30650028	1	30650028
S1_30700889	1	30700889
S1_30700908	1	30700908
S1_30701145	1	30701145
S1_30701148	1	30701148
S1_30701184	1	30701184
S1_30701219	1	30701219
S1_30746507	1	30746507
S1_30746547	1	30746547
S1_30746560	1	30746560
S1_30746568	1	30746568
S1_31181436	1	31181436
S1_31209868	1	31209868
S1_31209871	1	31209871
S1_31209887	1	31209887
S1_31209892	1	31209892
S1_31348371	1	31348371
S1_31348539	1	31348539
S1_31348628	1	31348628
S1_31348632	1	31348632
S1_31648283	1	31648283
S1_31648287	1	31648287
S1_31648300	1	31648300
S1_31648301	1	31648301
S1_31648465	1	31648465
S1_31648480	1	31648480
S1_31648493	1	31648493
S1_31648514	1	31648514
S1_31648519	1	31648519
S1_31648523	1	31648523
S1_31656741	1	31656741
S1_31656744	1	31656744
S1_31656748	1	31656748
S1_31656762	1	31656762
S1_31656778	1	31656778
S1_31656811	1	31656811
S1_31656816	1	31656816
S1_31697359	1	31697359
S1_31697392	1	31697392
S1_31697400	1	31697400
S1_31697413	1	31697413
S1_31697435	1	31697435
S1_31715930	1	31715930
S1_32047793	1	32047793
S1_32047813	1	32047813
S1_32047845	1	32047845
S1_32047865	1	32047865
S1_32295701	1	32295701
S1_32295714	1	32295714
S1_32295745	1	32295745
S1_32295788	1	32295788
S1_32368637	1	32368637
S1_32368921	1	32368921
S1_32381270	1	32381270
S1_32381321	1	32381321
S1_32381382	1	32381382
S1_32488259	1	32488259
S1_32488260	1	32488260
S1_32488262	1	32488262
S1_32488297	1	32488297
S1_32488354	1	32488354
S1_32575141	1	32575141
S1_32575170	1	32575170
S1_32575222	1	32575222
S1_32575402	1	32575402
S1_32575410	1	32575410
S1_32616986	1	32616986
S1_32616990	1	32616990
S1_32617021	1	32617021
S1_32617024	1	32617024
S1_32617061	1	32617061
S1_32617069	1	32617069
S1_32617076	1	32617076
S1_32617086	1	32617086
S1_32643698	1	32643698
S1_32643719	1	32643719
S1_32643736	1	32643736
S1_32643741	1	32643741
S1_32643748	1	32643748
S1_32643754	1	32643754
S1_32643774	1	32643774
S1_32643783	1	32643783
S1_32654625	1	32654625
S1_32654654	1	32654654
S1_32654711	1	32654711
S1_32654712	1	32654712
S1_32659148	1	32659148
S1_32659313	1	32659313
S1_32659363	1	32659363
S1_32659369	1	32659369
S1_32659397	1	32659397
S1_32659404	1	32659404
S1_32769085	1	32769085
S1_32769092	1	32769092
S1_32769093	1	32769093
S1_32769104	1	32769104
S1_32769108	1	32769108
S1_32769111	1	32769111
S1_32769113	1	32769113
S1_32769124	1	32769124
S1_32769158	1	32769158
S1_32769172	1	32769172
S1_32769175	1	32769175
S1_32769186	1	32769186
S1_32769191	1	32769191
S1_32769193	1	32769193
S1_32769204	1	32769204
S1_33008714	1	33008714
S1_33008836	1	33008836
S1_33008865	1	33008865
S1_33008873	1	33008873
S1_33008876	1	33008876
S1_33008877	1	33008877
S1_33008881	1	33008881
S1_33025484	1	33025484
S1_33026552	1	33026552
S1_33026565	1	33026565
S1_33026576	1	33026576
S1_33026615	1	33026615
S1_33026625	1	33026625
S1_33026635	1	33026635
S1_33026646	1	33026646
S1_33026648	1	33026648
S1_33026657	1	33026657
S1_33026665	1	33026665
S1_33026676	1	33026676
S1_33138387	1	33138387
S1_33138388	1	33138388
S1_33138393	1	33138393
S1_33138477	1	33138477
S1_33138500	1	33138500
S1_33211522	1	33211522
S1_33211535	1	33211535
S1_33211543	1	33211543
S1_33211579	1	33211579
S1_33211585	1	33211585
S1_33211608	1	33211608
S1_33232500	1	33232500
S1_33232521	1	33232521
S1_33232537	1	33232537
S1_33232545	1	33232545
S1_33381131	1	33381131
S1_33381135	1	33381135
S1_33381137	1	33381137
S1_33500573	1	33500573
S1_33500592	1	33500592
S1_33500599	1	33500599
S1_33500600	1	33500600
S1_33500613	1	33500613
S1_33500620	1	33500620
S1_33500622	1	33500622
S1_33500648	1	33500648
S1_33500649	1	33500649
S1_33500674	1	33500674
S1_33500679	1	33500679
S1_33500681	1	33500681
S1_33526495	1	33526495
S1_33526534	1	33526534
S1_33526544	1	33526544
S1_33675512	1	33675512
S1_33686349	1	33686349
S1_33686528	1	33686528
S1_33778515	1	33778515
S1_33788679	1	33788679
S1_33788725	1	33788725
S1_33788731	1	33788731
S1_33788748	1	33788748
S1_33836605	1	33836605
S1_33836708	1	33836708
S1_33836819	1	33836819
S1_33836830	1	33836830
S1_33836919	1	33836919
S1_33836931	1	33836931
S1_34019489	1	34019489
S1_34019521	1	34019521
S1_34019592	1	34019592
S1_34078752	1	34078752
S1_34139981	1	34139981
S1_34139988	1	34139988
S1_34139997	1	34139997
S1_34140064	1	34140064
S1_34433108	1	34433108
S1_34488181	1	34488181
S1_34488254	1	34488254
S1_34496070	1	34496070
S1_34567579	1	34567579
S1_34567587	1	34567587
S1_34567593	1	34567593
S1_34567600	1	34567600
S1_34567606	1	34567606
S1_34567615	1	34567615
S1_34634996	1	34634996
S1_34635362	1	34635362
S1_35216933	1	35216933
S1_35216956	1	35216956
S1_35216976	1	35216976
S1_35286897	1	35286897
S1_35287102	1	35287102
S1_35447050	1	35447050
S1_35593178	1	35593178
S1_35594938	1	35594938
S1_35619835	1	35619835
S1_35619870	1	35619870
S1_35620108	1	35620108
S1_35620110	1	35620110
S1_35620167	1	35620167
S1_35620189	1	35620189
S1_35620218	1	35620218
S1_35620220	1	35620220
S1_35620225	1	35620225
S1_35620239	1	35620239
S1_35620278	1	35620278
S1_35620279	1	35620279
S1_35708201	1	35708201
S1_35708206	1	35708206
S1_35708239	1	35708239
S1_35708240	1	35708240
S1_35708241	1	35708241
S1_35708250	1	35708250
S1_35708300	1	35708300
S1_35709472	1	35709472
S1_35709478	1	35709478
S1_35868648	1	35868648
S1_35868651	1	35868651
S1_35883288	1	35883288
S1_35883295	1	35883295
S1_35883337	1	35883337
S1_35883354	1	35883354
S1_35883363	1	35883363
S1_35883366	1	35883366
S1_35883376	1	35883376
S1_35883381	1	35883381
S1_35978142	1	35978142
S1_35988866	1	35988866
S1_36755770	1	36755770
S1_37355698	1	37355698
S1_37355734	1	37355734
S1_37374600	1	37374600
S1_37386672	1	37386672
S1_37386906	1	37386906
S1_37467368	1	37467368
S1_37467372	1	37467372
S1_37467385	1	37467385
S1_37467402	1	37467402
S1_37467404	1	37467404
S1_37467442	1	37467442
S1_37467451	1	37467451
S1_37467455	1	37467455
S1_37467458	1	37467458
S1_37467459	1	37467459
S1_37467460	1	37467460
S1_37467480	1	37467480
S1_37467483	1	37467483
S1_37467552	1	37467552
S1_37467566	1	37467566
S1_37467599	1	37467599
S1_37663943	1	37663943
S1_37664005	1	37664005
S1_37703865	1	37703865
S1_37703874	1	37703874
S1_37703875	1	37703875
S1_37703912	1	37703912
S1_37703927	1	37703927
S1_37706315	1	37706315
S1_37706327	1	37706327
S1_37706357	1	37706357
S1_37706363	1	37706363
S1_37706368	1	37706368
S1_37706371	1	37706371
S1_37706390	1	37706390
S1_37727902	1	37727902
S1_37727928	1	37727928
S1_37727931	1	37727931
S1_37727953	1	37727953
S1_37728041	1	37728041
S1_37728083	1	37728083
S1_37728089	1	37728089
S1_37728116	1	37728116
S1_37730088	1	37730088
S1_37730089	1	37730089
S1_37730413	1	37730413
S1_37730477	1	37730477
S1_37730586	1	37730586
S1_37928782	1	37928782
S1_38058204	1	38058204
S1_38058240	1	38058240
S1_38058375	1	38058375
S1_38058382	1	38058382
S1_38058403	1	38058403
S1_38058406	1	38058406
S1_38058413	1	38058413
S1_38058430	1	38058430
S1_38140370	1	38140370
S1_38140376	1	38140376
S1_38140390	1	38140390
S1_38140431	1	38140431
S1_38141038	1	38141038
S1_38141040	1	38141040
S1_38141050	1	38141050
S1_38147249	1	38147249
S1_38147255	1	38147255
S1_38156935	1	38156935
S1_38156939	1	38156939
S1_38156951	1	38156951
S1_38156955	1	38156955
S1_38156966	1	38156966
S1_38156967	1	38156967
S1_38156977	1	38156977
S1_38156981	1	38156981
S1_38168889	1	38168889
S1_38168898	1	38168898
S1_38168908	1	38168908
S1_38168922	1	38168922
S1_38168942	1	38168942
S1_38168956	1	38168956
S1_38169039	1	38169039
S1_38169045	1	38169045
S1_38169046	1	38169046
S1_38169051	1	38169051
S1_38169062	1	38169062
S1_38169066	1	38169066
S1_38169067	1	38169067
S1_38169093	1	38169093
S1_38169098	1	38169098
S1_38169108	1	38169108
S1_38483079	1	38483079
S1_38492093	1	38492093
S1_38493894	1	38493894
S1_38493898	1	38493898
S1_38532579	1	38532579
S1_38532695	1	38532695
S1_38543835	1	38543835
S1_38543848	1	38543848
S1_38544060	1	38544060
S1_38544076	1	38544076
S1_38595666	1	38595666
S1_38624865	1	38624865
S1_38624868	1	38624868
S1_38624870	1	38624870
S1_38624879	1	38624879
S1_38624917	1	38624917
S1_38624918	1	38624918
S1_38624937	1	38624937
S1_38625024	1	38625024
S1_38625030	1	38625030
S1_38625032	1	38625032
S1_38625049	1	38625049
S1_38625062	1	38625062
S1_38625083	1	38625083
S1_38625110	1	38625110
S1_38625120	1	38625120
S1_38625123	1	38625123
S1_38625207	1	38625207
S1_38625303	1	38625303
S1_38625319	1	38625319
S1_38625325	1	38625325
S1_38625337	1	38625337
S1_38625359	1	38625359
S1_38625363	1	38625363
S1_38625371	1	38625371
S1_38625400	1	38625400
S1_39617588	1	39617588
S1_39617624	1	39617624
S1_39617644	1	39617644
S1_39617658	1	39617658
S1_39617670	1	39617670
S1_39617678	1	39617678
S1_39654134	1	39654134
S1_39654167	1	39654167
S1_39693375	1	39693375
S1_39693577	1	39693577
S1_39693634	1	39693634
S1_39716603	1	39716603
S1_39818143	1	39818143
S1_39821037	1	39821037
S1_39822557	1	39822557
S1_39822583	1	39822583
S1_39822612	1	39822612
S1_39822642	1	39822642
S1_39822652	1	39822652
S1_39822661	1	39822661
S1_39823822	1	39823822
S1_39823982	1	39823982
S1_39889985	1	39889985
S1_39890154	1	39890154
S1_39890187	1	39890187
S1_39900200	1	39900200
S1_39900218	1	39900218
S1_39911427	1	39911427
S1_39911441	1	39911441
S1_39950035	1	39950035
S1_39950391	1	39950391
S1_39950395	1	39950395
S1_39950398	1	39950398
S1_40108337	1	40108337
S1_40108365	1	40108365
S1_40216209	1	40216209
S1_40216254	1	40216254
S1_40499359	1	40499359
S1_40526946	1	40526946
S1_40527096	1	40527096
S1_40527100	1	40527100
S1_40527128	1	40527128
S1_40527155	1	40527155
S1_40528906	1	40528906
S1_40528931	1	40528931
S1_40528940	1	40528940
S1_40529154	1	40529154
S1_40529224	1	40529224
S1_40545735	1	40545735
S1_40545739	1	40545739
S1_40545766	1	40545766
S1_40545817	1	40545817
S1_40559049	1	40559049
S1_40593273	1	40593273
S1_40593279	1	40593279
S1_40609484	1	40609484
S1_40673595	1	40673595
S1_40673596	1	40673596
S1_40673801	1	40673801
S1_41327177	1	41327177
S1_41380215	1	41380215
S1_41380248	1	41380248
S1_41380251	1	41380251
S1_41380262	1	41380262
S1_41380269	1	41380269
S1_41380293	1	41380293
S1_41380296	1	41380296
S1_41380303	1	41380303
S1_41380305	1	41380305
S1_41380311	1	41380311
S1_41380315	1	41380315
S1_41380321	1	41380321
S1_41380322	1	41380322
S1_41380327	1	41380327
S1_41380329	1	41380329
S1_41380332	1	41380332
S1_41380338	1	41380338
S1_41413467	1	41413467
S1_41413471	1	41413471
S1_41439881	1	41439881
S1_41439885	1	41439885
S1_41439901	1	41439901
S1_41439952	1	41439952
S1_41439959	1	41439959
S1_41439967	1	41439967
S1_41440997	1	41440997
S1_41441008	1	41441008
S1_41441029	1	41441029
S1_41441058	1	41441058
S1_41441080	1	41441080
S1_41441089	1	41441089
S1_41441289	1	41441289
S1_41441305	1	41441305
S1_41441363	1	41441363
S1_41441367	1	41441367
S1_41475622	1	41475622
S1_41475724	1	41475724
S1_41475742	1	41475742
S1_41476662	1	41476662
S1_42166023	1	42166023
S1_42166036	1	42166036
S1_42166052	1	42166052
S1_42166103	1	42166103
S1_42166110	1	42166110
S1_42311006	1	42311006
S1_42311037	1	42311037
S1_42311043	1	42311043
S1_42311063	1	42311063
S1_42311202	1	42311202
S1_42311224	1	42311224
S1_42311228	1	42311228
S1_42311235	1	42311235
S1_42311240	1	42311240
S1_42326663	1	42326663
S1_42326684	1	42326684
S1_42326708	1	42326708
S1_42326715	1	42326715
S1_42326720	1	42326720
S1_42395344	1	42395344
S1_42395345	1	42395345
S1_42395347	1	42395347
S1_42395365	1	42395365
S1_42395369	1	42395369
S1_42395376	1	42395376
S1_42395397	1	42395397
S1_42395414	1	42395414
S1_42939675	1	42939675
S1_42981196	1	42981196
S1_42981420	1	42981420
S1_42981461	1	42981461
S1_42983402	1	42983402
S1_43114544	1	43114544
S1_43114553	1	43114553
S1_43116429	1	43116429
S1_43116437	1	43116437
S1_43116438	1	43116438
S1_43257884	1	43257884
S1_43257919	1	43257919
S1_43389619	1	43389619
S1_43390938	1	43390938
S1_43523022	1	43523022
S1_43523091	1	43523091
S1_43523133	1	43523133
S1_43523135	1	43523135
S1_43523291	1	43523291
S1_43523308	1	43523308
S1_43523317	1	43523317
S1_43523324	1	43523324
S1_43523344	1	43523344
S1_43523347	1	43523347
S1_43523389	1	43523389
S1_43523427	1	43523427
S1_43523428	1	43523428
S1_43523458	1	43523458
S1_43523473	1	43523473
S1_43523488	1	43523488
S1_43523497	1	43523497
S1_43523702	1	43523702
S1_43523723	1	43523723
S1_43523765	1	43523765
S1_43523769	1	43523769
S1_43524099	1	43524099
S1_43524157	1	43524157
S1_43524162	1	43524162
S1_43680429	1	43680429
S1_43712181	1	43712181
S1_43712579	1	43712579
S1_43760482	1	43760482
S1_43760512	1	43760512
S1_43760547	1	43760547
S1_43760557	1	43760557
S1_43760564	1	43760564
S1_43760572	1	43760572
S1_43775625	1	43775625
S1_43775675	1	43775675
S1_43775694	1	43775694
S1_43794119	1	43794119
S1_43794123	1	43794123
S1_43794143	1	43794143
S1_43794151	1	43794151
S1_43794182	1	43794182
S1_43794199	1	43794199
S1_43794202	1	43794202
S1_43794349	1	43794349
S1_43794419	1	43794419
S1_45040404	1	45040404
S1_45040429	1	45040429
S1_45059475	1	45059475
S1_45337885	1	45337885
S1_45337911	1	45337911
S1_45337924	1	45337924
S1_45337955	1	45337955
S1_45343034	1	45343034
S1_45378218	1	45378218
S1_45378250	1	45378250
S1_45378261	1	45378261
S1_45378271	1	45378271
S1_45635784	1	45635784
S1_45635805	1	45635805
S1_45635807	1	45635807
S1_45635839	1	45635839
S1_45635998	1	45635998
S1_45636001	1	45636001
S1_45636016	1	45636016
S1_45636024	1	45636024
S1_45636031	1	45636031
S1_45636042	1	45636042
S1_45636056	1	45636056
S1_45636065	1	45636065
S1_45636071	1	45636071
S1_45649613	1	45649613
S1_45649815	1	45649815
S1_45649868	1	45649868
S1_45649873	1	45649873
S1_45649879	1	45649879
S1_45783923	1	45783923
S1_45783976	1	45783976
S1_45783998	1	45783998
S1_45784103	1	45784103
S1_45784194	1	45784194
S1_45784196	1	45784196
S1_45784215	1	45784215
S1_45856597	1	45856597
S1_45856609	1	45856609
S1_45856742	1	45856742
S1_45856749	1	45856749
S1_45856815	1	45856815
S1_45917138	1	45917138
S1_45917334	1	45917334
S1_45917358	1	45917358
S1_45917365	1	45917365
S1_45917367	1	45917367
S1_45917382	1	45917382
S1_45917386	1	45917386
S1_45917394	1	45917394
S1_45917397	1	45917397
S1_45967449	1	45967449
S1_45968990	1	45968990
S1_46400131	1	46400131
S1_46400134	1	46400134
S1_46400136	1	46400136
S1_46400137	1	46400137
S1_46400139	1	46400139
S1_46400144	1	46400144
S1_46400160	1	46400160
S1_46400161	1	46400161
S1_46400165	1	46400165
S1_46400177	1	46400177
S1_46400183	1	46400183
S1_46400191	1	46400191
S1_46400193	1	46400193
S1_46997322	1	46997322
S1_46997330	1	46997330
S1_46997345	1	46997345
S1_46997360	1	46997360
S1_47117124	1	47117124
S1_47117130	1	47117130
S1_47117165	1	47117165
S1_47117184	1	47117184
S1_47129083	1	47129083
S1_47129278	1	47129278
S1_47129295	1	47129295
S1_47129339	1	47129339
S1_47161041	1	47161041
S1_47161057	1	47161057
S1_47212314	1	47212314
S1_47212315	1	47212315
S1_47212323	1	47212323
S1_47212329	1	47212329
S1_47212332	1	47212332
S1_47212348	1	47212348
S1_47212365	1	47212365
S1_47212381	1	47212381
S1_47216592	1	47216592
S1_47216602	1	47216602
S1_47216612	1	47216612
S1_47216624	1	47216624
S1_47216630	1	47216630
S1_47216632	1	47216632
S1_47216638	1	47216638
S1_47216645	1	47216645
S1_47216654	1	47216654
S1_47216661	1	47216661
S1_47216664	1	47216664
S1_47216666	1	47216666
S1_47216678	1	47216678
S1_47216679	1	47216679
S1_47216682	1	47216682
S1_47216687	1	47216687
S1_47216701	1	47216701
S1_47262367	1	47262367
S1_47262399	1	47262399
S1_47262582	1	47262582
S1_47262589	1	47262589
S1_47371884	1	47371884
S1_47371904	1	47371904
S1_47371910	1	47371910
S1_47371947	1	47371947
S1_47371949	1	47371949
S1_47371958	1	47371958
S1_47371971	1	47371971
S1_47408347	1	47408347
S1_47408896	1	47408896
S1_47466631	1	47466631
S1_47630605	1	47630605
S1_47630751	1	47630751
S1_47630761	1	47630761
S1_47630775	1	47630775
S1_47630815	1	47630815
S1_47630816	1	47630816
S1_47682387	1	47682387
S1_47682422	1	47682422
S1_47682430	1	47682430
S1_47682444	1	47682444
S1_47682445	1	47682445
S1_47682448	1	47682448
S1_47682466	1	47682466
S1_47788993	1	47788993
S1_47935038	1	47935038
S1_47935072	1	47935072
S1_47935079	1	47935079
S1_47935086	1	47935086
S1_47935105	1	47935105
S1_47935120	1	47935120
S1_47935129	1	47935129
S1_48143116	1	48143116
S1_48143170	1	48143170
S1_48194959	1	48194959
S1_48248234	1	48248234
S1_48253571	1	48253571
S1_48266888	1	48266888
S1_48266905	1	48266905
S1_48266922	1	48266922
S1_48266923	1	48266923
S1_48375121	1	48375121
S1_48400323	1	48400323
S1_48400354	1	48400354
S1_48400638	1	48400638
S1_48404811	1	48404811
S1_48404814	1	48404814
S1_48404817	1	48404817
S1_48404826	1	48404826
S1_48404836	1	48404836
S1_48495213	1	48495213
S1_48495227	1	48495227
S1_48673219	1	48673219
S1_48673220	1	48673220
S1_48673237	1	48673237
S1_48673293	1	48673293
S1_48673299	1	48673299
S1_48673301	1	48673301
S1_48673478	1	48673478
S1_48675551	1	48675551
S1_49066425	1	49066425
S1_49066480	1	49066480
S1_49198245	1	49198245
S1_49198295	1	49198295
S1_49198311	1	49198311
S1_49198523	1	49198523
S1_49230861	1	49230861
S1_49230866	1	49230866
S1_49230873	1	49230873
S1_49230906	1	49230906
S1_49230908	1	49230908
S1_49230909	1	49230909
S1_49230933	1	49230933
S1_49230934	1	49230934
S1_49230935	1	49230935
S1_49294161	1	49294161
S1_49311732	1	49311732
S1_49312025	1	49312025
S1_49356999	1	49356999
S1_49357043	1	49357043
S1_49357054	1	49357054
S1_49357060	1	49357060
S1_49357091	1	49357091
S1_49433356	1	49433356
S1_49433388	1	49433388
S1_49501868	1	49501868
S1_49516873	1	49516873
S1_49563546	1	49563546
S1_49563550	1	49563550
S1_49563554	1	49563554
S1_49563564	1	49563564
S1_49563578	1	49563578
S1_49693078	1	49693078
S1_49693134	1	49693134
S1_49693141	1	49693141
S1_49693235	1	49693235
S1_49996746	1	49996746
S1_49996775	1	49996775
S1_49996800	1	49996800
S1_50022518	1	50022518
S1_50022528	1	50022528
S1_50162344	1	50162344
S1_50162345	1	50162345
S1_50162374	1	50162374
S1_50162375	1	50162375
S1_50162385	1	50162385
S1_50162411	1	50162411
S1_50162415	1	50162415
S1_50162430	1	50162430
S1_50162446	1	50162446
S1_50308686	1	50308686
S1_50308687	1	50308687
S1_50308736	1	50308736
S1_50339419	1	50339419
S1_50339425	1	50339425
S1_50339446	1	50339446
S1_50339456	1	50339456
S1_50339463	1	50339463
S1_50339468	1	50339468
S1_50339470	1	50339470
S1_50339515	1	50339515
S1_50339517	1	50339517
S1_50339519	1	50339519
S1_50356751	1	50356751
S1_50512488	1	50512488
S1_50512506	1	50512506
S1_50512530	1	50512530
S1_50672595	1	50672595
S1_50775360	1	50775360
S1_50775365	1	50775365
S1_50838788	1	50838788
S1_50838803	1	50838803
S1_50838820	1	50838820
S1_50838834	1	50838834
S1_50838837	1	50838837
S1_50955967	1	50955967
S1_50955999	1	50955999
S1_50956084	1	50956084
S1_51160651	1	51160651
S1_51160716	1	51160716
S1_51190573	1	51190573
S1_51264094	1	51264094
S1_51264109	1	51264109
S1_51264113	1	51264113
S1_51264116	1	51264116
S1_51264128	1	51264128
S1_51264167	1	51264167
S1_51264184	1	51264184
S1_51386635	1	51386635
S1_51386957	1	51386957
S1_51388466	1	51388466
S1_51465912	1	51465912
S1_51465941	1	51465941
S1_51465961	1	51465961
S1_51465987	1	51465987
S1_51466007	1	51466007
S1_51466015	1	51466015
S1_51466045	1	51466045
S1_51466214	1	51466214
S1_51466264	1	51466264
S1_51466266	1	51466266
S1_51632337	1	51632337
S1_51632453	1	51632453
S1_51632461	1	51632461
S1_51641349	1	51641349
S1_51641364	1	51641364
S1_51775452	1	51775452
S1_51775454	1	51775454
S1_51775475	1	51775475
S1_51775518	1	51775518
S1_51775520	1	51775520
S1_51775598	1	51775598
S1_51775608	1	51775608
S1_51775609	1	51775609
S1_51775644	1	51775644
S1_51775647	1	51775647
S1_51775661	1	51775661
S1_51809835	1	51809835
S1_51809847	1	51809847
S1_51809875	1	51809875
S1_51809893	1	51809893
S1_51809894	1	51809894
S1_51810130	1	51810130
S1_51908680	1	51908680
S1_52348746	1	52348746
S1_52348771	1	52348771
S1_52348838	1	52348838
S1_52348841	1	52348841
S1_52356277	1	52356277
S1_52363884	1	52363884
S1_52514202	1	52514202
S1_52514211	1	52514211
S1_52514223	1	52514223
S1_52514226	1	52514226
S1_52514240	1	52514240
S1_52514244	1	52514244
S1_52514253	1	52514253
S1_52514277	1	52514277
S1_52514290	1	52514290
S1_52610749	1	52610749
S1_52610785	1	52610785
S1_52747511	1	52747511
S1_52747520	1	52747520
S1_52747554	1	52747554
S1_52801304	1	52801304
S1_52801338	1	52801338
S1_52801339	1	52801339
S1_53260632	1	53260632
S1_53260760	1	53260760
S1_53260768	1	53260768
S1_53293883	1	53293883
S1_53308797	1	53308797
S1_53308861	1	53308861
S1_53309041	1	53309041
S1_53321753	1	53321753
S1_53847732	1	53847732
S1_53847796	1	53847796
S1_53998356	1	53998356
S1_53998397	1	53998397
S1_54176501	1	54176501
S1_54176570	1	54176570
S1_54231970	1	54231970
S1_54254019	1	54254019
S1_54296243	1	54296243
S1_54296280	1	54296280
S1_54296289	1	54296289
S1_54296307	1	54296307
S1_54303405	1	54303405
S1_54596505	1	54596505
S1_54596786	1	54596786
S1_54953891	1	54953891
S1_55257703	1	55257703
S1_55258353	1	55258353
S1_55258430	1	55258430
S1_55483556	1	55483556
S1_55483706	1	55483706
S1_55511413	1	55511413
S1_55511423	1	55511423
S1_55511484	1	55511484
S1_55511489	1	55511489
S1_55511511	1	55511511
S1_55511517	1	55511517
S1_55546054	1	55546054
S1_55546076	1	55546076
S1_55591776	1	55591776
S1_55591811	1	55591811
S1_55591845	1	55591845
S1_55591847	1	55591847
S1_55591861	1	55591861
S1_55600678	1	55600678
S1_55629883	1	55629883
S1_55630170	1	55630170
S1_55630171	1	55630171
S1_55649758	1	55649758
S1_55649771	1	55649771
S1_55649778	1	55649778
S1_55649786	1	55649786
S1_55649812	1	55649812
S1_55649827	1	55649827
S1_55649829	1	55649829
S1_55649831	1	55649831
S1_55681437	1	55681437
S1_55681439	1	55681439
S1_55681467	1	55681467
S1_55681521	1	55681521
S1_55835474	1	55835474
S1_55835477	1	55835477
S1_55835512	1	55835512
S1_55835529	1	55835529
S1_55835539	1	55835539
S1_55835553	1	55835553
S1_55835562	1	55835562
S1_55845867	1	55845867
S1_55845893	1	55845893
S1_55845900	1	55845900
S1_55845906	1	55845906
S1_55845915	1	55845915
S1_55846214	1	55846214
S1_55889580	1	55889580
S1_55889844	1	55889844
S1_55889881	1	55889881
S1_55910522	1	55910522
S1_55910580	1	55910580
S1_55910596	1	55910596
S1_55924622	1	55924622
S1_55924693	1	55924693
S1_55924701	1	55924701
S1_55924712	1	55924712
S1_55924721	1	55924721
S1_55924733	1	55924733
S1_55924743	1	55924743
S1_56314962	1	56314962
S1_56618047	1	56618047
S1_56618061	1	56618061
S1_56690929	1	56690929
S1_56690931	1	56690931
S1_56690937	1	56690937
S1_56690973	1	56690973
S1_56690974	1	56690974
S1_56690993	1	56690993
S1_56691008	1	56691008
S1_56820452	1	56820452
S1_56820453	1	56820453
S1_56837822	1	56837822
S1_56837849	1	56837849
S1_56837879	1	56837879
S1_56936523	1	56936523
S1_57081222	1	57081222
S1_57081224	1	57081224
S1_57081227	1	57081227
S1_57081231	1	57081231
S1_57081238	1	57081238
S1_57081247	1	57081247
S1_57081248	1	57081248
S1_57081261	1	57081261
S1_57081291	1	57081291
S1_57081292	1	57081292
S1_57285613	1	57285613
S1_57285627	1	57285627
S1_57285640	1	57285640
S1_57285656	1	57285656
S1_57285665	1	57285665
S1_57285857	1	57285857
S1_57285867	1	57285867
S1_57404156	1	57404156
S1_57404193	1	57404193
S1_57435628	1	57435628
S1_57435636	1	57435636
S1_57435665	1	57435665
S1_57435667	1	57435667
S1_57435674	1	57435674
S1_57435676	1	57435676
S1_57435682	1	57435682
S1_57435909	1	57435909
S1_57435919	1	57435919
S1_57435941	1	57435941
S1_57705208	1	57705208
S1_57931696	1	57931696
S1_58033783	1	58033783
S1_58033807	1	58033807
S1_58033810	1	58033810
S1_58033823	1	58033823
S1_58033862	1	58033862
S1_58033863	1	58033863
S1_58033886	1	58033886
S1_58055418	1	58055418
S1_58055445	1	58055445
S1_58055492	1	58055492
S1_58055517	1	58055517
S1_58055535	1	58055535
S1_58055542	1	58055542
S1_58151587	1	58151587
S1_58151609	1	58151609
S1_58151644	1	58151644
S1_58151649	1	58151649
S1_58151650	1	58151650
S1_58151653	1	58151653
S1_58153106	1	58153106
S1_58153123	1	58153123
S1_58153144	1	58153144
S1_58153178	1	58153178
S1_58153200	1	58153200
S1_58153207	1	58153207
S1_58153367	1	58153367
S1_58153424	1	58153424
S1_58153472	1	58153472
S1_58890885	1	58890885
S1_58890901	1	58890901
S1_58890902	1	58890902
S1_58890903	1	58890903
S1_58890909	1	58890909
S1_58890918	1	58890918
S1_58890947	1	58890947
S1_58890951	1	58890951
S1_58890958	1	58890958
S1_58890960	1	58890960
S1_58921264	1	58921264
S1_58921308	1	58921308
S1_59120504	1	59120504
S1_59120519	1	59120519
S1_59214872	1	59214872
S1_59214881	1	59214881
S1_59214937	1	59214937
S1_59351012	1	59351012
S1_59372066	1	59372066
S1_59372102	1	59372102
S1_59372255	1	59372255
S1_59421931	1	59421931
S1_59421964	1	59421964
S1_59622311	1	59622311
S1_59622572	1	59622572
S1_59622587	1	59622587
S1_59622589	1	59622589
S1_59622603	1	59622603
S1_59631663	1	59631663
S1_59639017	1	59639017
S1_59639067	1	59639067
S1_59639078	1	59639078
S1_59903013	1	59903013
S1_59903058	1	59903058
S1_59903273	1	59903273
S1_59903290	1	59903290
S1_59903296	1	59903296
S1_59903319	1	59903319
S1_59903369	1	59903369
S1_59903375	1	59903375
S1_60361883	1	60361883
S1_60361887	1	60361887
S1_60361920	1	60361920
S1_60361933	1	60361933
S1_60362252	1	60362252
S1_60411383	1	60411383
S1_60423255	1	60423255
S1_61077030	1	61077030
S1_61303078	1	61303078
S1_61303327	1	61303327
S1_61303332	1	61303332
S1_61303365	1	61303365
S1_61303399	1	61303399
S1_61398362	1	61398362
S1_61398366	1	61398366
S1_61398368	1	61398368
S1_61398387	1	61398387
S1_61398409	1	61398409
S1_61501334	1	61501334
S1_61501570	1	61501570
S1_61863270	1	61863270
S1_61863279	1	61863279
S1_61863290	1	61863290
S1_61863305	1	61863305
S1_61863327	1	61863327
S1_61863354	1	61863354
S1_61880465	1	61880465
S1_61974430	1	61974430
S1_61974435	1	61974435
S1_61974449	1	61974449
S1_61974452	1	61974452
S1_62080175	1	62080175
S1_62080176	1	62080176
S1_62080216	1	62080216
S1_62080221	1	62080221
S1_62080242	1	62080242
S1_62080255	1	62080255
S1_62149992	1	62149992
S1_62150071	1	62150071
S1_62255646	1	62255646
S1_62255652	1	62255652
S1_62278773	1	62278773
S1_62278774	1	62278774
S1_62278999	1	62278999
S1_62541817	1	62541817
S1_62541885	1	62541885
S1_62585376	1	62585376
S1_62601120	1	62601120
S1_62611160	1	62611160
S1_62611205	1	62611205
S1_62611210	1	62611210
S1_62636489	1	62636489
S1_62636511	1	62636511
S1_62636518	1	62636518
S1_62636558	1	62636558
S1_62636590	1	62636590
S1_62636610	1	62636610
S1_62724493	1	62724493
S1_62724520	1	62724520
S1_62724566	1	62724566
S1_62728773	1	62728773
S1_62728775	1	62728775
S1_62728840	1	62728840
S1_62752086	1	62752086
S1_62752128	1	62752128
S1_62752144	1	62752144
S1_62752153	1	62752153
S1_62752325	1	62752325
S1_62752330	1	62752330
S1_62752333	1	62752333
S1_62752355	1	62752355
S1_62752408	1	62752408
S1_62752434	1	62752434
S1_62752438	1	62752438
S1_62752440	1	62752440
S1_62827865	1	62827865
S1_62827871	1	62827871
S1_62827878	1	62827878
S1_62827881	1	62827881
S1_62827884	1	62827884
S1_62827889	1	62827889
S1_62827891	1	62827891
S1_62827907	1	62827907
S1_62862393	1	62862393
S1_62862401	1	62862401
S1_63508835	1	63508835
S1_63508880	1	63508880
S1_63687698	1	63687698
S1_63687726	1	63687726
S1_63687922	1	63687922
S1_63687947	1	63687947
S1_63687958	1	63687958
S1_63723182	1	63723182
S1_63723184	1	63723184
S1_63723188	1	63723188
S1_63723189	1	63723189
S1_63723191	1	63723191
S1_63723196	1	63723196
S1_63723216	1	63723216
S1_63723228	1	63723228
S1_63723231	1	63723231
S1_63723235	1	63723235
S1_63723263	1	63723263
S1_63723284	1	63723284
S1_63910709	1	63910709
S1_63910950	1	63910950
S1_63910957	1	63910957
S1_63948612	1	63948612
S1_63948640	1	63948640
S1_63948645	1	63948645
S1_63948646	1	63948646
S1_63948654	1	63948654
S1_63948662	1	63948662
S1_63948675	1	63948675
S1_63948682	1	63948682
S1_63948683	1	63948683
S1_64075173	1	64075173
S1_64075218	1	64075218
S1_64075220	1	64075220
S1_64132225	1	64132225
S1_64132228	1	64132228
S1_64132230	1	64132230
S1_64132250	1	64132250
S1_64132285	1	64132285
S1_64132318	1	64132318
S1_64191126	1	64191126
S1_64191140	1	64191140
S1_64191148	1	64191148
S1_64191223	1	64191223
S1_64191261	1	64191261
S1_64346868	1	64346868
S1_64346870	1	64346870
S1_64346873	1	64346873
S1_64346878	1	64346878
S1_64346896	1	64346896
S1_64346898	1	64346898
S1_64346909	1	64346909
S1_64536794	1	64536794
S1_64754025	1	64754025
S1_64754251	1	64754251
S1_64754269	1	64754269
S1_64754272	1	64754272
S1_64810771	1	64810771
S1_64810800	1	64810800
S1_64810813	1	64810813
S1_64810831	1	64810831
S1_64949370	1	64949370
S1_64949406	1	64949406
S1_64949632	1	64949632
S1_65010637	1	65010637
S1_65010661	1	65010661
S1_65010680	1	65010680
S1_65010684	1	65010684
[truncated: 76,821 more rows]
