# Supplementary material for: Genome-wide association studies reveal potential candidate genes associated with amino acid in tea plants
Source: PeerJ. 2025 Mar 4;13:e18969. doi: 10.7717/peerj.18969 (PMC11887564; doi:10.7717/peerj.18969)
Supplement: Table S3 [file peerj-13-18969-s006.xlsx]

## Sheet: Sheet1
Table S3 SNPs density of chromosome based on GBS
Chromosome	Length(bp)	SNP	Density(kb)
1	222690619	7596	34.1101
2	212893553	5984	28.1079
3	187305764	4627	24.7029
4	196128943	6007	30.6278
5	194778845	4584	23.5344
6	180870292	5413	29.9275
7	187027217	4863	26.0016
8	162894436	5173	31.7568
9	165397305	4429	26.7779
10	166753223	4386	26.3023
11	123582105	3918	31.7036
12	162686597	4419	27.1627
13	136080369	3700	27.1898
14	133792454	3795	28.3648
15	119038877	3273	27.4952
Conting	386837826	6651	17.1933
Total	2938758425	78819	26.8205
