# Supplementary material for: Genome-wide association studies reveal potential candidate genes associated with amino acid in tea plants
Source: PeerJ. 2025 Mar 4;13:e18969. doi: 10.7717/peerj.18969 (PMC11887564; doi:10.7717/peerj.18969)
Supplement: Table S4 [file peerj-13-18969-s007.xlsx]

## Sheet: Sheet1
Table S4. Statistics of the number and ratio of the 212 tea accessions, and cultivation status in four inferred groups（k=2）
Inferred populations	Name	Total numbers	Species	Numbers	Ratio of Species	Cultivation status	Numbers	Ratio of cultivation status
Q1	Wild tree group	9	camellia remotiserrata	2	0.222222	Wild tree	2	1
			Camellia tachangensis	7	0.777778	Wild tree	7	1
Q2	Ancient landraces group	145	Camellia sinensis	134	0.924138	Ancient landraces	99	0.738806
						Modern landraces	32	0.238806
						breeding variety	3	0.0223881
			camellia remotiserrata	5	0.0344828	Wild tree	3	0.6
						Ancient landraces	2	0.4
			Camellia tachangensis	6	0.0413793	Wild tree	6	1
Q3	admixture group	58	Camellia sinensis	4	0.0275862	Ancient landraces	4	1
			camellia remotiserrata	31	0.534483	Ancient landraces	1	0.0322581
						Wild tree	30	0.967742
			Camellia tachangensis	20	0.344828	Wild tree	20	1
			Camellia taliensis	3	0.0517241	Wild tree	3	1
