# Supplementary material for: Genome-wide association studies reveal potential candidate genes associated with amino acid in tea plants
Source: PeerJ. 2025 Mar 4;13:e18969. doi: 10.7717/peerj.18969 (PMC11887564; doi:10.7717/peerj.18969)
Supplement: Table S5 [file peerj-13-18969-s008.xlsx]

## Sheet: Sheet1
Table S5. Statistics of the number and ratio of the 212 tea accessions, and cultivation status in four inferred groups（k=3）
Inferred populations	Name	Total numbers	Species	Numbers	Ratio of Species	Cultivation status	Numbers	Ratio of cultivation status
Q1	Ancient landraces group	77	Camellia sinensis	74	0.961039	Ancient landraces	63	0.851351
						Modern landraces	11	0.148649
			Camellia remotiserrata	3	0.038961	Ancient landraces	2	0.666667
						Wild tree	1	0.333333
Q2	Modern landraces group	23	Camellia sinensis	18	0.782609	Modern landraces	12	0.666667
						Ancient landraces	4	0.222222
						breeding variety	2	0.111111
			Camellia tachangensis	4	0.173913	Wild tree	4	1
			Camellia remotiserrata	1	0.0434783		1	1
Q3	Wild tree group	9	Camellia tachangensis	7	0.777778	Wild tree	7	1
			Camellia remotiserrata	2	0.222222	Wild tree	2	1
Q4	admixture group	103	Camellia sinensis	46	0.446602	Ancient landraces	36	0.782609
						Modern landraces	9	0.195652
						breeding variety	1	0.0217391
			Camellia remotiserrata	32	0.31068	Wild tree	31	0.96875
						Ancient landraces	1	0.03125
			Camellia tachangensis	22	0.213592	Wild tree	22	1
			Camellia taliensis	3	0.0291262	Wild tree	3	1
