# Supplementary material for: Genome-wide association studies reveal potential candidate genes associated with amino acid in tea plants
Source: PeerJ. 2025 Mar 4;13:e18969. doi: 10.7717/peerj.18969 (PMC11887564; doi:10.7717/peerj.18969)
Supplement: Table S6 [file peerj-13-18969-s009.xlsx]

## Sheet: Sheet1
Table S6 Phenotypic data for 212 tea accessions
Code	Sample Name	DNA ID	Aa-Environment	Inferred populations
1	GZ002	3	4.637	Q1
2	GZ003	8	3.484	Q1
3	GZ004	15	4.248	Q1
4	GZ005	18	4.19	Q1
5	GZ007	22	3.78	Q1
6	GZ012	28	4.824	Q1
7	GZ017	44	4.049	Q1
8	GZ019	51	4.034	Q1
9	GZ020	60	3.968	Q1
10	GZ022	63	2.922	Q1
11	GZ027	76	4.325	Q1
12	GZ032	85	3.135	Q1
13	GZ034	92	3.33	Q1
14	GZ053	131	2.973	Q1
15	GZ068	171	2.972	Q1
16	GZ071	177	4.362	Q1
17	GZ073	186	3.14	Q1
18	GZ075	192	3.364	Q1
19	GZ078	195	3.457	Q1
20	GZ079	199	3.796	Q1
21	GZ080	200	3.961	Q1
22	GZ081	201	4.138	Q1
23	GZ082	202	3.148	Q1
24	GZ085	206	3.425	Q1
25	GZ088	217	3.389	Q1
26	GZ090	233	2.105	Q1
27	GZ093	239	3.547	Q1
28	GZ100	260	3.973	Q1
29	GZ101	263	4.895	Q1
30	GZ103	267	3.571	Q1
31	GZ104	269	3.513	Q1
32	GZ105	270	2.851	Q1
33	GZ108	280	2.914	Q1
34	GZ109	281	3.276	Q1
35	GZ116	294	3.169	Q1
36	GZ118	297	3.524	Q1
37	GZ120	299	2.447	Q1
38	GZ121	302	2.201	Q1
39	GZ122	303	3.166	Q1
40	GZ124	306	4.601	Q1
41	GZ125	307	2.698	Q1
42	GZ127	311	4.111	Q1
43	GZ128	314	2.878	Q1
44	GZ136	331	3.305	Q1
45	GZ137	333	3.543	Q1
46	GZ141	361	3.725	Q1
47	GZ144	364	3.681	Q1
48	GZ146	370	4.183	Q1
49	GZ148	375	3.342	Q1
50	GZ149	376	3.287	Q1
51	GZ151	378	4.179	Q1
52	GZ152	379	5.207	Q1
53	GZ153	380	3.569	Q1
54	GZ154	381	3.943	Q1
55	GZ155	382	4.081	Q1
56	GZ158	386	2.732	Q1
57	GZ159	387	4.458	Q1
58	GZ161	389	4.244	Q1
59	GZ163	391	2.68	Q1
60	GZ165	395	3.044	Q1
61	GZ167	399	2.737	Q1
62	GZ170	402	3.907	Q1
63	GZ174	411	2.801	Q1
64	GZ177	420	2.313	Q1
65	GZ180	425	2.065	Q1
66	GZ182	427	2.479	Q1
67	GZ183	430	2.153	Q1
68	GZ188	438	2.258	Q1
69	GZ189	445	2.294	Q1
70	GZ190	446	2.259	Q1
71	GZ191	448	2.968	Q1
72	GZ192	449	1.568	Q1
73	GZ196	458	2.273	Q1
74	GZ199	463	1.619	Q1
75	GZ200	465	1.39	Q1
76	GZ202	467	1.896	Q1
77	GZ207	485	1.328	Q1
78	GZ001	1	4.304	Q2
79	GZ013	33	2.954	Q2
80	GZ014	34	3.331	Q2
81	GZ030	83	3.74	Q2
82	GZ036	97	3.05	Q2
83	GZ037	100	3.105	Q2
84	GZ039	107	2.722	Q2
85	GZ051	128	3.522	Q2
86	GZ055	134	3.308	Q2
87	GZ094	241	2.482	Q2
88	GZ106	273	3.933	Q2
89	GZ107	279	3.978	Q2
90	GZ114	292	3.099	Q2
91	GZ115	293	3.121	Q2
92	GZ123	304	3.52	Q2
93	GZ139	354	4.785	Q2
94	GZ178	422	4.274	Q2
95	GZ193	454	2.021	Q2
96	GZ203	468	2.401	Q2
97	GZ204	469	1.88	Q2
98	GZ205	480	1.599	Q2
99	GZ208	540	4.732	Q2
100	GZ209	541	2.064	Q2
101	GZ015	38	3.601	Q3
102	GZ038	103	3.019	Q3
103	GZ064	152	4.431	Q3
104	GZ097	249	4.084	Q3
105	GZ143	363	3.679	Q3
106	GZ162	390	2.907	Q3
107	GZ169	401	2.311	Q3
108	GZ179	424	2.793	Q3
109	GZ187	435	1.487	Q3
110	GZ006	21	4.51	Q4
111	GZ008	24	3.403	Q4
112	GZ009	25	4.197	Q4
113	GZ010	26	3.275	Q4
114	GZ011	27	3.342	Q4
115	GZ016	40	3.47	Q4
116	GZ018	48	3.827	Q4
117	GZ021	62	3.153	Q4
118	GZ023	67	4.136	Q4
119	GZ024	70	4	Q4
120	GZ025	71	3.265	Q4
121	GZ026	73	2.793	Q4
122	GZ028	79	3.996	Q4
123	GZ029	80	3.671	Q4
124	GZ031	84	4.641	Q4
125	GZ033	89	2.987	Q4
126	GZ035	93	2.067	Q4
127	GZ040	108	4.038	Q4
128	GZ041	110	2.714	Q4
129	GZ042	114	3.333	Q4
130	GZ043	117	3.661	Q4
131	GZ044	118	2.755	Q4
132	GZ045	119	3.463	Q4
133	GZ046	120	2.416	Q4
134	GZ047	122	3.115	Q4
135	GZ048	123	3.66	Q4
136	GZ049	124	3.657	Q4
137	GZ050	126	4.688	Q4
138	GZ052	130	3.829	Q4
139	GZ054	133	4.328	Q4
140	GZ056	136	3.975	Q4
141	GZ057	137	3.344	Q4
142	GZ058	138	3.938	Q4
143	GZ059	139	3.457	Q4
144	GZ060	141	3.975	Q4
145	GZ061	146	2.879	Q4
146	GZ062	148	3.152	Q4
147	GZ063	151	2.302	Q4
148	GZ065	153	2.861	Q4
149	GZ066	157	2.275	Q4
150	GZ067	161	3.105	Q4
151	GZ069	172	3.587	Q4
152	GZ070	173	3.227	Q4
153	GZ072	178	3.726	Q4
154	GZ074	190	3.106	Q4
155	GZ076	193	3.445	Q4
156	GZ077	194	4.656	Q4
157	GZ083	203	1.743	Q4
158	GZ084	205	5.001	Q4
159	GZ086	210	3.064	Q4
160	GZ087	213	2.834	Q4
161	GZ089	227	3.262	Q4
162	GZ091	235	3.254	Q4
163	GZ092	237	2.765	Q4
164	GZ095	244	4.065	Q4
165	GZ096	245	2.59	Q4
166	GZ098	251	3.516	Q4
167	GZ099	252	4.164	Q4
168	GZ102	265	2.438	Q4
169	GZ110	282	3.288	Q4
170	GZ111	284	3.31	Q4
171	GZ112	286	3.138	Q4
172	GZ113	287	2.686	Q4
173	GZ117	296	2.987	Q4
174	GZ119	298	2.792	Q4
175	GZ126	309	3.885	Q4
176	GZ129	316	3.763	Q4
177	GZ130	318	3.554	Q4
178	GZ131	319	2.715	Q4
179	GZ132	320	2.72	Q4
180	GZ133	323	4.246	Q4
181	GZ134	326	3.252	Q4
182	GZ135	329	2.319	Q4
183	GZ138	353	4.545	Q4
184	GZ140	357	2.572	Q4
185	GZ142	362	2.523	Q4
186	GZ145	365	5.53	Q4
187	GZ147	374	3.385	Q4
188	GZ150	377	4.695	Q4
189	GZ156	383	4.119	Q4
190	GZ157	385	4.091	Q4
191	GZ160	388	4.062	Q4
192	GZ164	393	3.256	Q4
193	GZ166	398	3.251	Q4
194	GZ168	400	4.004	Q4
195	GZ171	404	3.827	Q4
196	GZ172	407	3.86	Q4
197	GZ173	410	4.296	Q4
198	GZ175	415	3.519	Q4
199	GZ176	419	3.809	Q4
200	GZ181	426	2.648	Q4
201	GZ184	431	1.78	Q4
202	GZ185	432	1.592	Q4
203	GZ186	433	1.314	Q4
204	GZ194	455	1.725	Q4
205	GZ195	457	2.117	Q4
206	GZ197	460	1.412	Q4
207	GZ198	462	2.516	Q4
208	GZ201	466	1.31	Q4
209	GZ206	484	1.403	Q4
210	GZ210	N10	2.038	Q4
211	GZ211	N8	4.756	Q4
212	GZ212	N9	4.551	Q4
