# Supplementary material for: Genome-wide association studies reveal potential candidate genes associated with amino acid in tea plants
Source: PeerJ. 2025 Mar 4;13:e18969. doi: 10.7717/peerj.18969 (PMC11887564; doi:10.7717/peerj.18969)
Supplement: Table S7 [file peerj-13-18969-s010.xlsx]

## Sheet: Sheet1
Table S7 Six models were used to screen for SNP loci that were significantly associated with amino acids
Traits	Model	SNPs	Chromosome	Position	− Log10P	R2(%)	Allele
Aa	GLM(P)	S1_169435208	1	169435208	4.117	0.1045	G/A
		S2_151915980	2	151915980	4.534	0.1136	G/A
		S2_151915996	2	151915996	4.417	0.1131	T/C
		S5_46409247	5	46409247	4.057	0.0882	T/C
		S10_90937109	10	90937109	4.233	0.0941	G/C
		S10_90937133	10	90937133	4.88	0.1049	C/T
		S11_64920241	11	64920241	4.089	0.0965	C/T
		S12_134931733	12	134931733	4.647	0.1049	A/G
	GLM(Q)	S1_69609671	1	69609671	4.41641	0.101514	A/G
		S1_138794717	1	138794717	4.36614	0.105692	C/A
		S1_138794748	1	138794748	4.3425	0.106834	C/G
		S1_207642843	1	207642843	4.44467	0.10979	A/G
		S2_67294022	2	67294022	4.8918	0.123431	G/C
		S2_151915980	2	151915980	5.66372	0.141466	G/A
		S2_151915996	2	151915996	5.37082	0.137659	T/C
		S2_173470328	2	173470328	5.30738	0.131048	C/T
		S5_46409247	5	46409247	4.26811	0.093602	T/C
		S6_88990985	6	88990985	4.0461	0.101552	T/C
		S6_88990990	6	88990990	4.33192	0.108323	A/G
		S7_40992852	7	40992852	4.11551	0.092169	TGTATGTAAACATTGATTACAACAAAGACACGATATACATTTAAACACATATACA/T
		S10_90937133	10	90937133	4.4662	0.097727	C/T
		S11_64920241	11	64920241	5.03718	0.118448	C/T
		S12_134931733	12	134931733	4.69327	0.108602	A/G
	MLM(P+K)	S2_151915980	2	151915980	4.13512	0.119916	G/A
		S10_90937133	10	90937133	4.12136	0.0971147	C/T
		S12_134931733	12	134931733	4.02929	0.108507	A/G
	MLM(Q+K)	S2_151915980	2	151915980	4.43017	0.127267	G/A
		S2_151915996	2	151915996	4.23087	0.122311	T/C
		S10_90937133	10	90937133	4.20925	0.0983248	C/T
		S12_134931733	12	134931733	4.08563	0.108737	A/G
	CMLM(P+K)	S2_151915980	2	151915980	4.01678	0.118479	G/A
	CMLM(Q+K)	S2_67294022	2	67294022	4.08815	0.113146	G/C
