# Supplementary material for: Genome-wide association studies reveal potential candidate genes associated with amino acid in tea plants
Source: PeerJ. 2025 Mar 4;13:e18969. doi: 10.7717/peerj.18969 (PMC11887564; doi:10.7717/peerj.18969)
Supplement: Table S8 [file peerj-13-18969-s011.xlsx]

## Sheet: Sheet1
Table S8 Primers for gene
Primer name	5' to 3'
TEA022785.1-1-1	CAAGTTGCAAAGGCTGCCAA
TEA022785.1-1-2	TAGTTCTGGTGGGATTGGTGC
TEA027937.1-2-1	AGGCTGCACTCTTTGCTCTT
TEA027937.1-2-2	ACCTCTGGATAGCACGAGTAGT
TEA013853.1-3-1	GTTGGCAGAGGATCAAAAGAGAGA
TEA013853.1-3-2	CCCCTCATACGCTCAATCTCC
TEA008491.1-4-1	GAGGGACAAAACCCAGCTCC
TEA008491.1-4-2	TTCCAGAGTAGCCATGTTCTTTTG
