# Supplementary material for: Genome-wide association studies reveal potential candidate genes associated with amino acid in tea plants
Source: PeerJ. 2025 Mar 4;13:e18969. doi: 10.7717/peerj.18969 (PMC11887564; doi:10.7717/peerj.18969)
Supplement: Table S9 [file peerj-13-18969-s012.xlsx]

## Sheet: Sheet1
Table S9 Analysis of TEA027937.1 potential candidate gene expression in 9 tea accessions.
Serial No.	Internal reference gene-Cq				Target gene-Cq			2^-(△△Ct)
	Ct-1	Ct-2	Ct-3		Ct-1	Ct-2	Ct-3
GZ145	20.88	20.91	21.57		29.28	29.68	28.89	5.24399
GZ152	21.26	21.52	21.32		29.53	29.78	29.62	4.40793
GZ084	21.71	21.14	20.88		29.62	28.95	29.6	5.00517
GZ014	20.7	20.73	20.45		29.45	30.08	29.71	2.4996
GZ034	20.43	20.26	20.18		29.92	29.93	30.18	1.63788
GZ111	20.46	20.17	20.18		29.32	29.58	30.06	2.13387
GZ207	20.24	20.11	20.22		30.55	30.46	30.81	1.00361
GZ186	20.29	19.56	19.37		30.42	30.56	30.4	0.846974
GZ201	19.63	19.7	20.15		30.52	30.17	30.89	0.827742
