# Supplementary material for: Genome-wide association studies reveal potential candidate genes associated with amino acid in tea plants
Source: PeerJ. 2025 Mar 4;13:e18969. doi: 10.7717/peerj.18969 (PMC11887564; doi:10.7717/peerj.18969)
Supplement: Table S10 [file peerj-13-18969-s013.xlsx]

## Sheet: Sheet1
Table S10 Reverse transcription system
Reagent	Volume
Rnase-free ddH20	to 16μL
4 × gDNA wiper Mix	4μL
Template ARNA	Total RNA:1 pg-1μg
5 × HiScript III qRT SuperMix	4μL
Total	20μL
