# Supplementary material for: Genome-wide association studies reveal potential candidate genes associated with amino acid in tea plants
Source: PeerJ. 2025 Mar 4;13:e18969. doi: 10.7717/peerj.18969 (PMC11887564; doi:10.7717/peerj.18969)
Supplement: Table S11 [file peerj-13-18969-s014.xlsx]

## Sheet: Sheet1
Table S11 qPCR system
Reagent	Volume(μL)
2 × ChamQ Universal SYBR qPCR Master Mix	10
Primer 1 (10 µM)	0.5
Primer 2 (10 µM)	0.5
Template cDNA	2
ddH20	7
