# Supplementary material for: Genome-wide association studies reveal potential candidate genes associated with amino acid in tea plants
Source: PeerJ. 2025 Mar 4;13:e18969. doi: 10.7717/peerj.18969 (PMC11887564; doi:10.7717/peerj.18969)
Supplement: Table S12 [file peerj-13-18969-s015.xlsx]

## Sheet: Sheet1
Table S12 Complete thermocycling parameters
stage 1	Pre-denaturation	Rep: 1	95℃	30sec
stage 2	Cyclic reactions	Reps: 40	95℃	10sec
			60℃	30sec
stage 3	Melting curves	Rep: 1	95℃	15sec
			60℃	60sec
			95℃	15sec
