# Supplementary material for: Genome-wide association studies reveal potential candidate genes associated with amino acid in tea plants
Source: PeerJ. 2025 Mar 4;13:e18969. doi: 10.7717/peerj.18969 (PMC11887564; doi:10.7717/peerj.18969)
Supplement: Table S13 [file peerj-13-18969-s016.xls]

## Sheet: Sheet1
Table S13 MIQE checklist for qPCR methods and analysis
ITEM TO CHECK	IMPORTANCE	CHECKLIST
EXPERIMENTAL DESIGN
Definition of experimental and control groups	E	Yes
Number within each group	E	3 samples/triplicate expts
Assay carried out by core lab or investigator's lab?	D	Investigator's lab
Acknowledgement of authors' contributions	D	Yes (separate section at end of text)
SAMPLE
Description	E	Fresh leaves
Volume/mass of sample processed	D	Not applicable
Microdissection or macrodissection	E	macrodissection
Processing procedure	E
If frozen - how and how quickly?	E	Yes, RNA frozen at -80 degrees immediately after isolation
If fixed - with what, how quickly?	E	Not applicable
Sample storage conditions and duration (especially for FFPE samples)	E	Stored at -80 in degrees for 1-5 day
NUCLEIC ACID EXTRACTION
Procedure and/or instrumentation	E
Name of kit and details of any modifications	E	See line 159
Source of additional reagents used	D	Not applicable
Details of DNase or RNAse treatment	E	RNA resuspended on ice and reverse transcriptase reactions were treated with RNAse; no DNase treatment
Contamination assessment (DNA or RNA)	E	Done by OD 260/280 determination; see 22, 23 below;
Nucleic acid quantification	E
Instrument and method	E	Ultra-microvolume spectrophotometer;RNA extracts are measured directly
Purity (A260/A280)	D	Approximately 2.0 for each sample
Yield	D
RNA integrity method/instrument	E	Agarose gel electrophoresis
RIN/RQI or Cq of 3' and 5' transcripts	E	Not performed
Electrophoresis traces	D
Inhibition testing (Cq dilutions, spike or other)	E	Not performed
REVERSE TRANSCRIPTION
Complete reaction conditions	E	Supplied in Supplemental Table S8
Amount of RNA and reaction volume	E	See Supplemental Table S8: depending on the reaction
Priming oligonucleotide (if using GSP) and concentration	E	Not applicable
Reverse transcriptase and concentration	E	See Supplemental Table S8: depending on the reaction
Temperature and time	E	15 min at 37°C, and 5 sec at 85°C, depending on the reaction
Manufacturer of reagents and catalogue numbers	D
Cqs with and without RT	D*	Not performed
Storage conditions of cDNA	D	Stored at -20 in degrees
qPCR TARGET INFORMATION
If multiplex, efficiency and LOD of each assay.	E	Not applicable
Sequence accession number	E	Not applicable
Location of amplicon	D
Amplicon length	E	80-200 nts
In silico specificity screen (BLAST, etc)	E	Yes, BLAST analysis performed
Pseudogenes, retropseudogenes or other homologs?	D	None
Sequence alignment	D	Done
Secondary structure analysis of amplicon	D	Not performed
Location of each primer by exon or intron (if applicable)	E	Not applicable
What splice variants are targeted?	E	None
qPCR OLIGONUCLEOTIDES
Primer sequences	E	See Supplemental Table S7
RTPrimerDB Identification Number	D	Not applicable
Probe sequences	D**	Not applicable
Location and identity of any modifications	E	None
Manufacturer of oligonucleotides	D
Purification method	D
qPCR PROTOCOL
Complete reaction conditions	E	Supplied in Supplemental Table S9
Reaction volume and amount of cDNA/DNA	E	2 μl of cDNA prep in 20 μl total volumne
Primer, (probe), Mg++ and dNTP concentrations	E	1 μl of primer. (probe), Mg++ and dNTP concentrations were not added additional
Polymerase identity and concentration	E	Not performed
Buffer/kit identity and manufacturer	E	See line 162
Exact chemical constitution of the buffer	D
Additives (SYBR Green I, DMSO, etc.)	E	SYBR
Manufacturer of plates/tubes and catalog number	D
Complete thermocycling parameters	E	Supplied in Supplemental Table S10
Reaction setup (manual/robotic)	D	Manual
Manufacturer of qPCR instrument	E	Jena, Germany
qPCR VALIDATION
Evidence of optimisation (from gradients)	D	None
Specificity (gel, sequence, melt, or digest)	E	None
For SYBR Green I, Cq of the NTC	E	Not performed
Standard curves with slope and y-intercept	E	Not performed
PCR efficiency calculated from slope	E	Not performed
Confidence interval for PCR efficiency or standard error	D	Standard Error
r2 of standard curve	E	Not performed
Linear dynamic range	E	Yes
Cq variation at lower limit	E	Not performed
Confidence intervals throughout range	D	Not performed
Evidence for limit of detection	E	Not performed
If multiplex, efficiency and LOD of each assay.	E	Not applicable
DATA ANALYSIS
qPCR analysis program (source, version)	E	Microsoft Excel version 2409 Build 16.0.18025.20030
Cq method determination	E	See line 165
Outlier identification and disposition	E	None
Results of NTCs	E	Not performed
Justification of number and choice of reference genes	E	None
Description of normalisation method	E	Not performed
Number and concordance of biological replicates	D	3
Number and stage (RT or qPCR) of technical replicates	E	3
Repeatability (intra-assay variation)	E	within reason
Reproducibility (inter-assay variation, %CV)	D	Presented in Figures as Standard Error
Power analysis	D	Not performed
Statistical methods for result significance	E	ANOVA
Software (source, version)	E	Microsoft Excel version 2409 Build 16.0.18025.20030
Cq or raw data submission using RDML	D	None
Table 1. MIQE checklist for authors, reviewers and editors. All essential information (E) must be submitted with the manuscript. Desirable
information (D) should be submitted if available. If using primers obtained from RTPrimerDB, information on qPCR target, oligonucleotides,
protocols and validation is available from that source.
*: Assessing the absence of DNA using a no RT assay is essential when first extracting RNA. Once the sample has been validated as
RDNA-free, inclusion of a no-RT control is desirable, but no longer essential.
**: Disclosure of the probe sequence is highly desirable and strongly encouraged. However, since not all commercial pre-designed assay
vendors provide this information, it cannot be an essential requirement. Use of such assays is advised against.
